# Supplementary material for: Proteome Analysis of Subsarcolemmal Cardiomyocyte Mitochondria: A Comparison of Different Analytical Platforms
Source: MDPI journal article supplement (doi:10.3390/ijms15069285), 2014-05-26
Supplement: s1 [file s1]

## Supplementary Information

**Figure S1.** Mass Spectrometry (MS/MS) spectra for acetylated peptides. SDS-PAGE, sodium dodecyl sulfate-polyacrylamide gel electrophoresis; IEF, isoelectric focusing; PLRP, polymeric reversed-phase liquid chromatography at high pH. (1–28) From SDS-PAGE; (29–36) From IEF; (37–39) From PLRP.

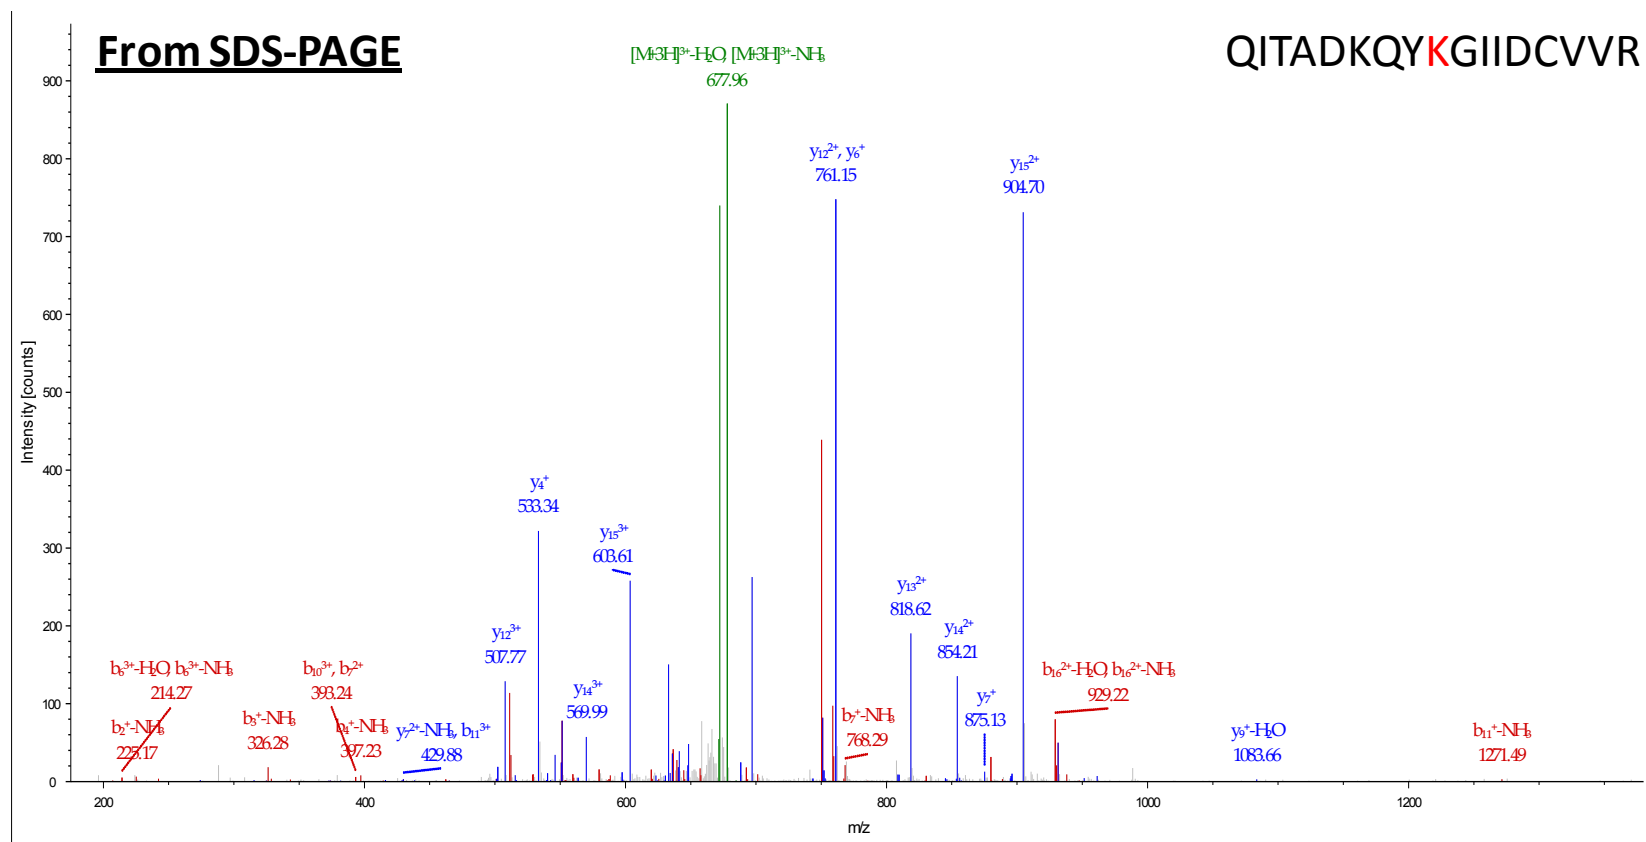

(1)

Figure S1. Cont.

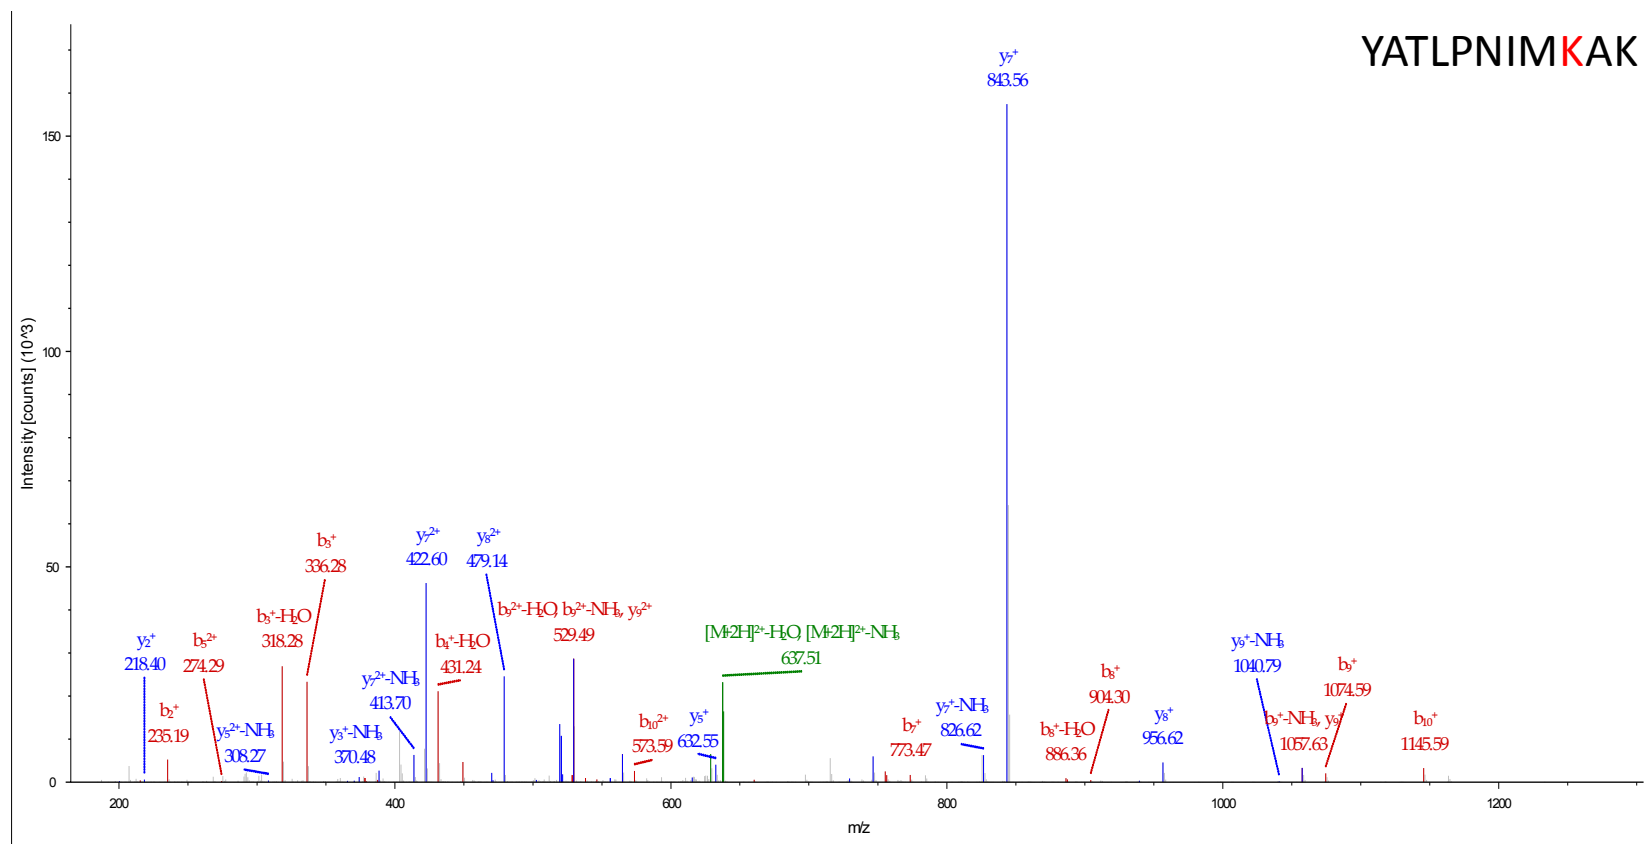

(2)

Figure S1. Cont.

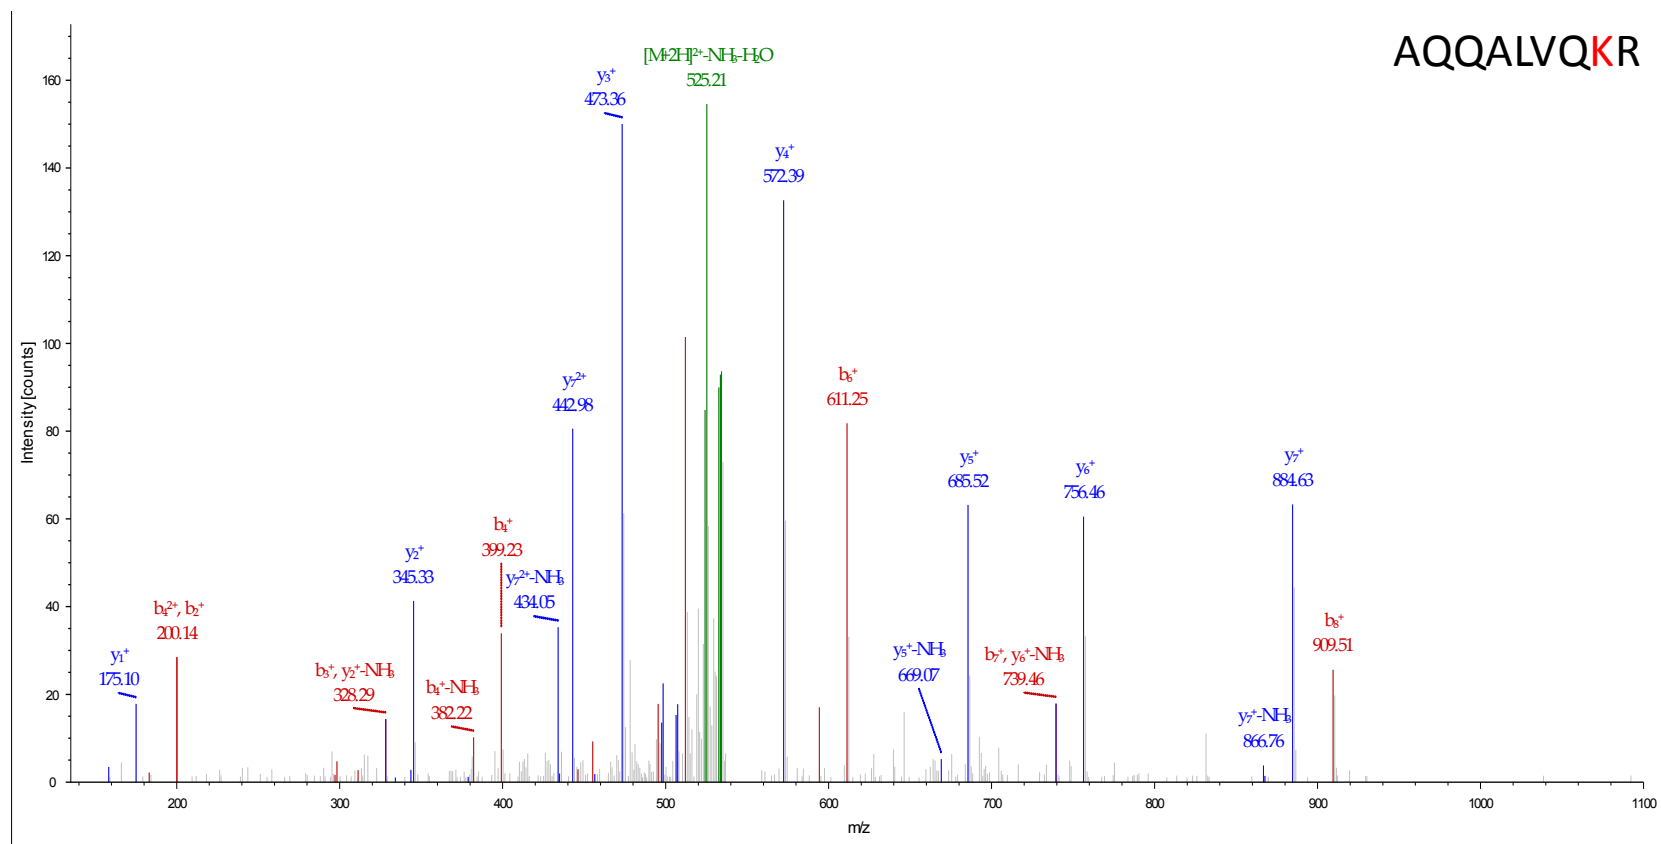

(3)

Figure S1. Cont.

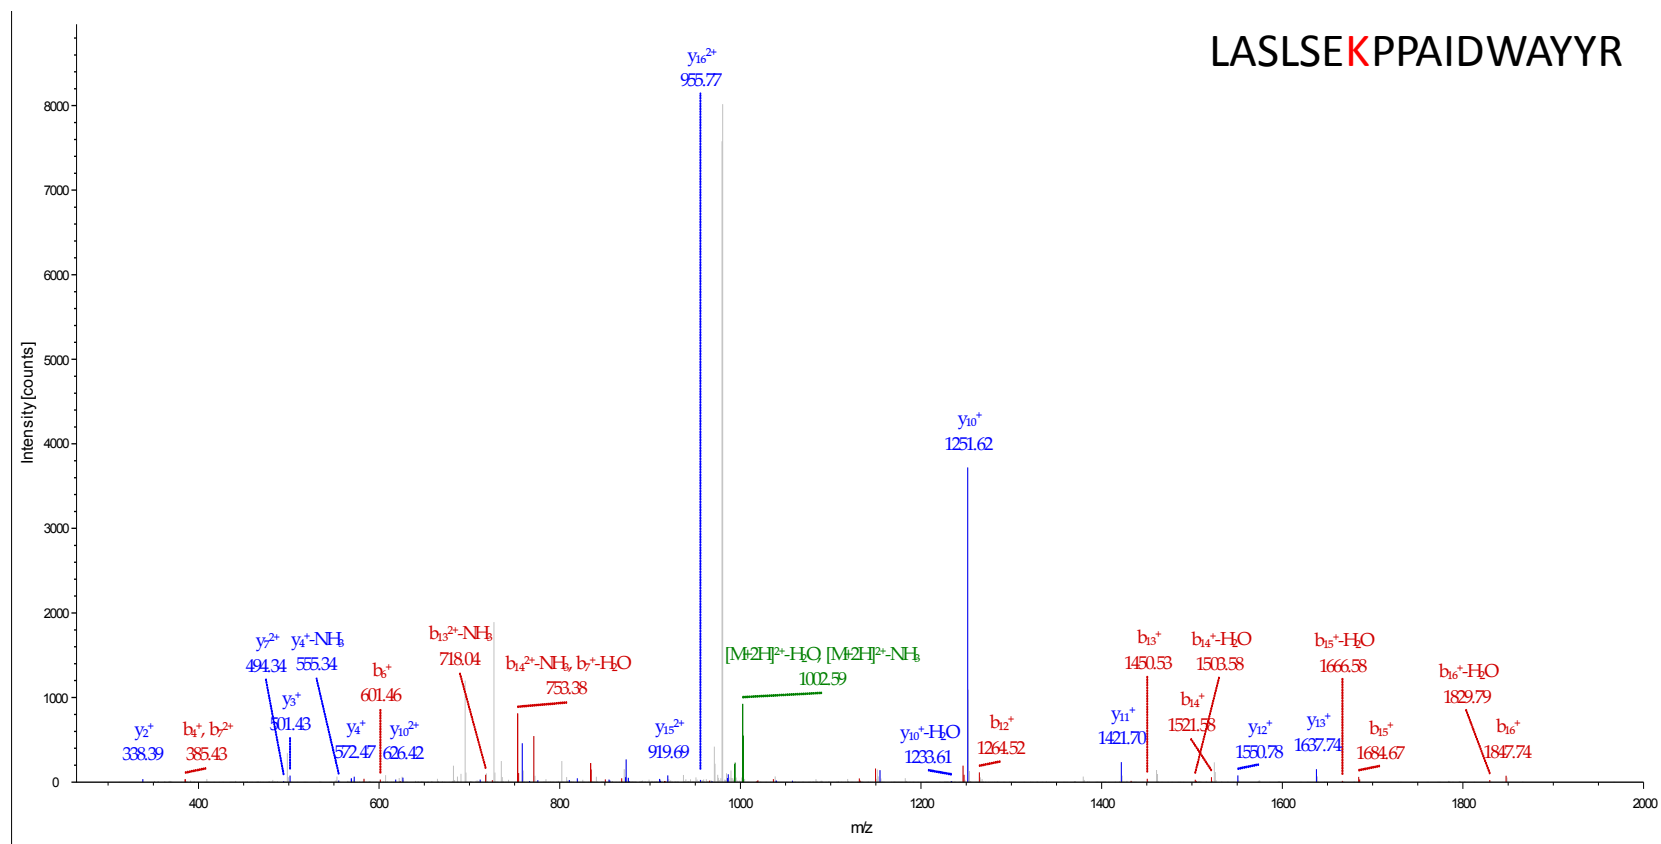

(4)

Figure S1. Cont.

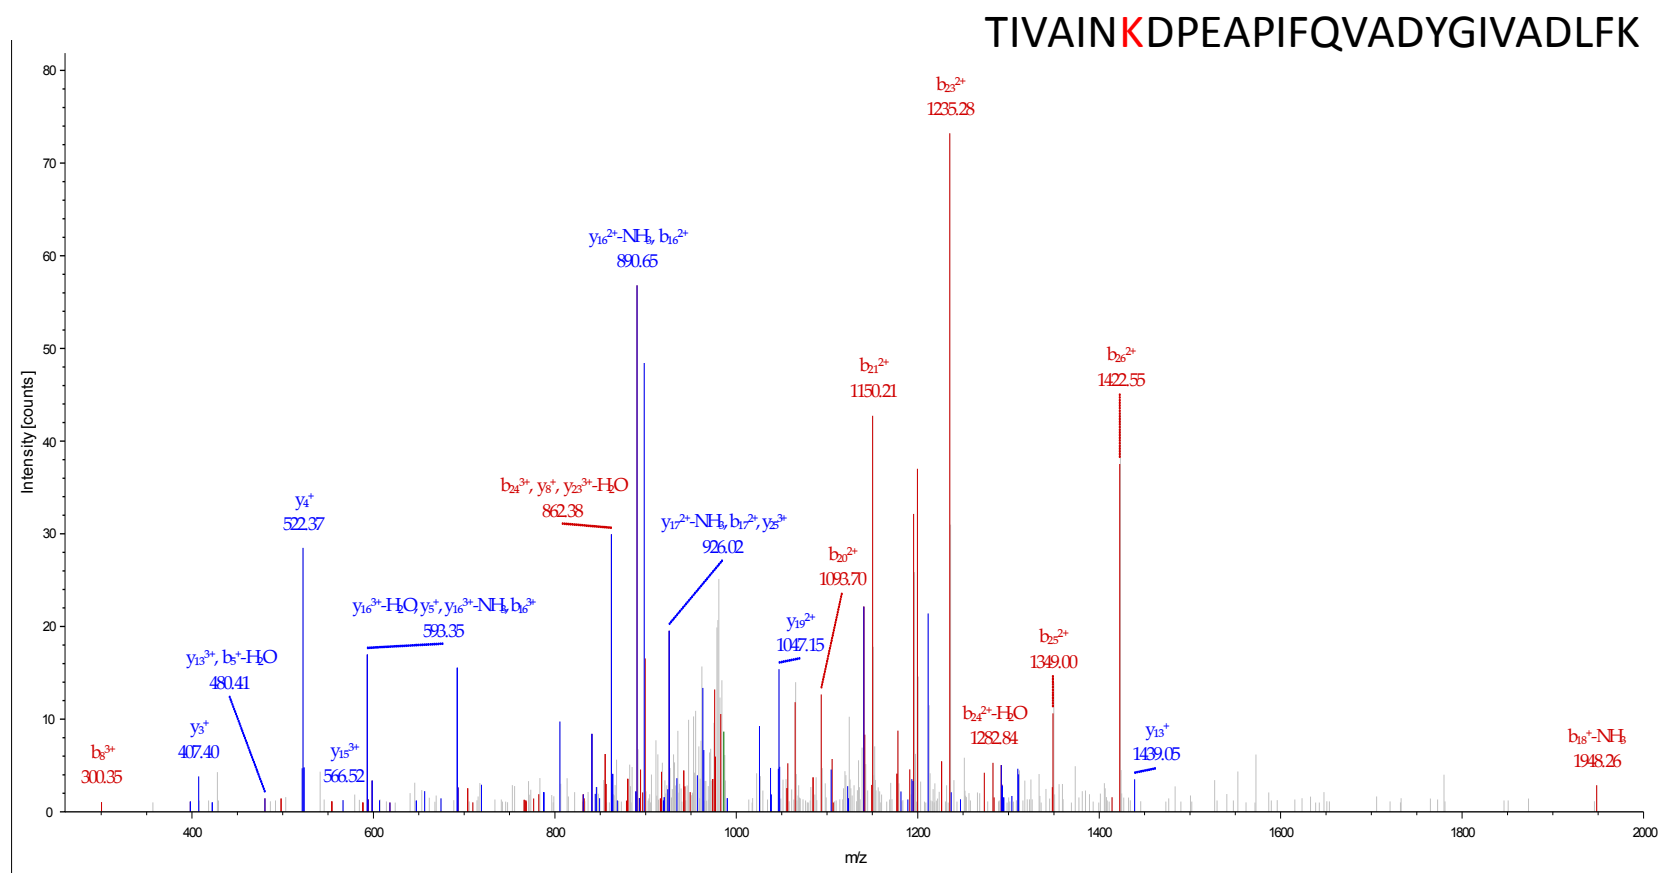

Figure S1. Cont.

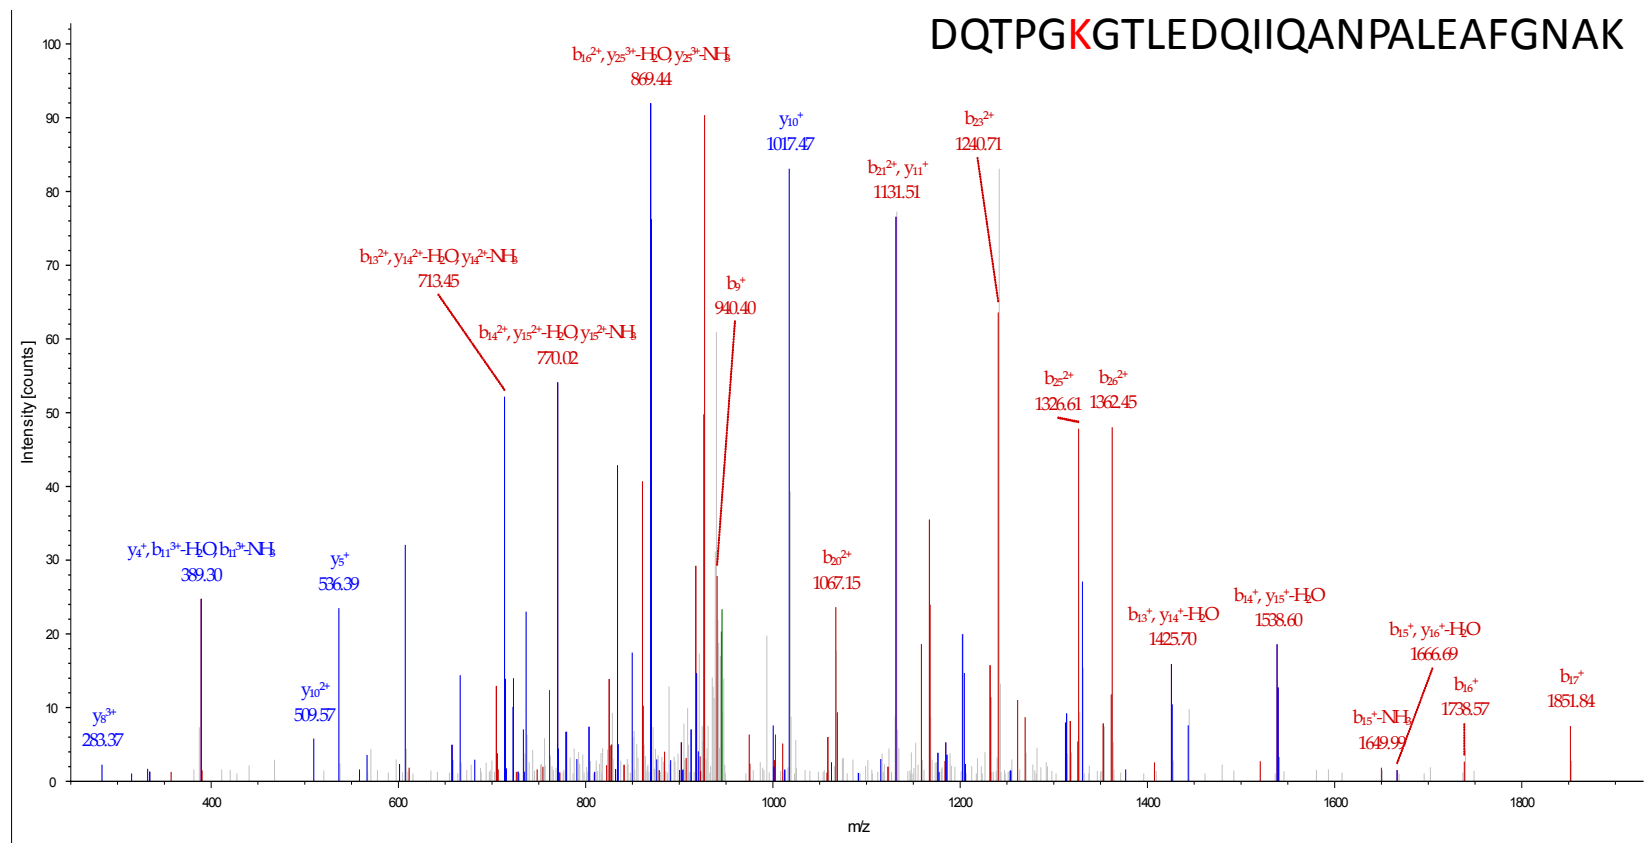

(6)

Figure S1. Cont.

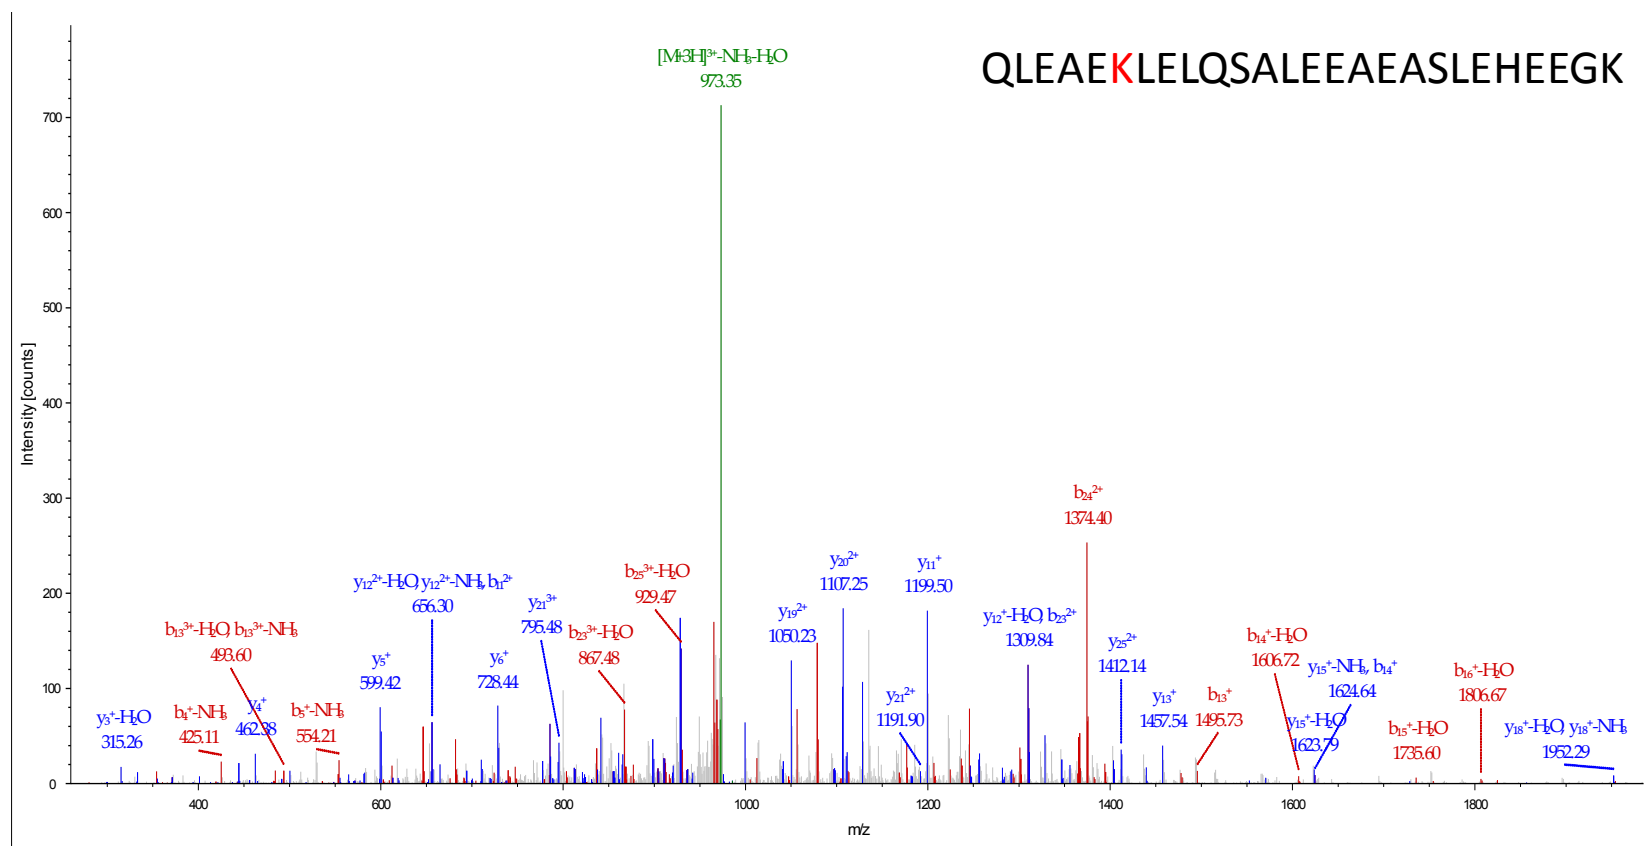

(7)

Figure S1. Cont.

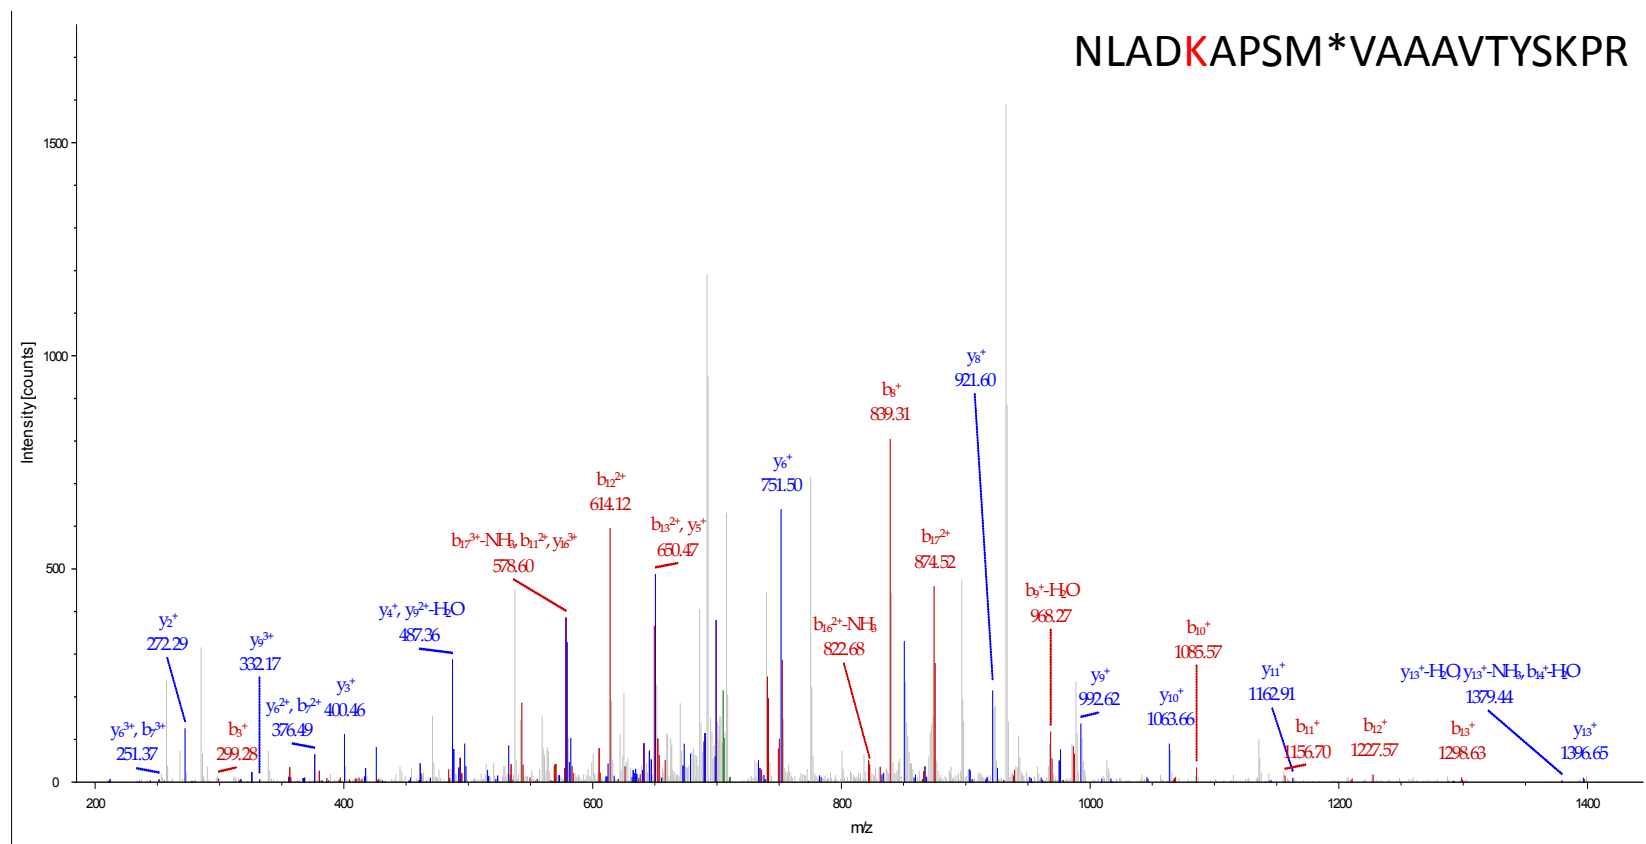

(8)

Figure S1. Cont.

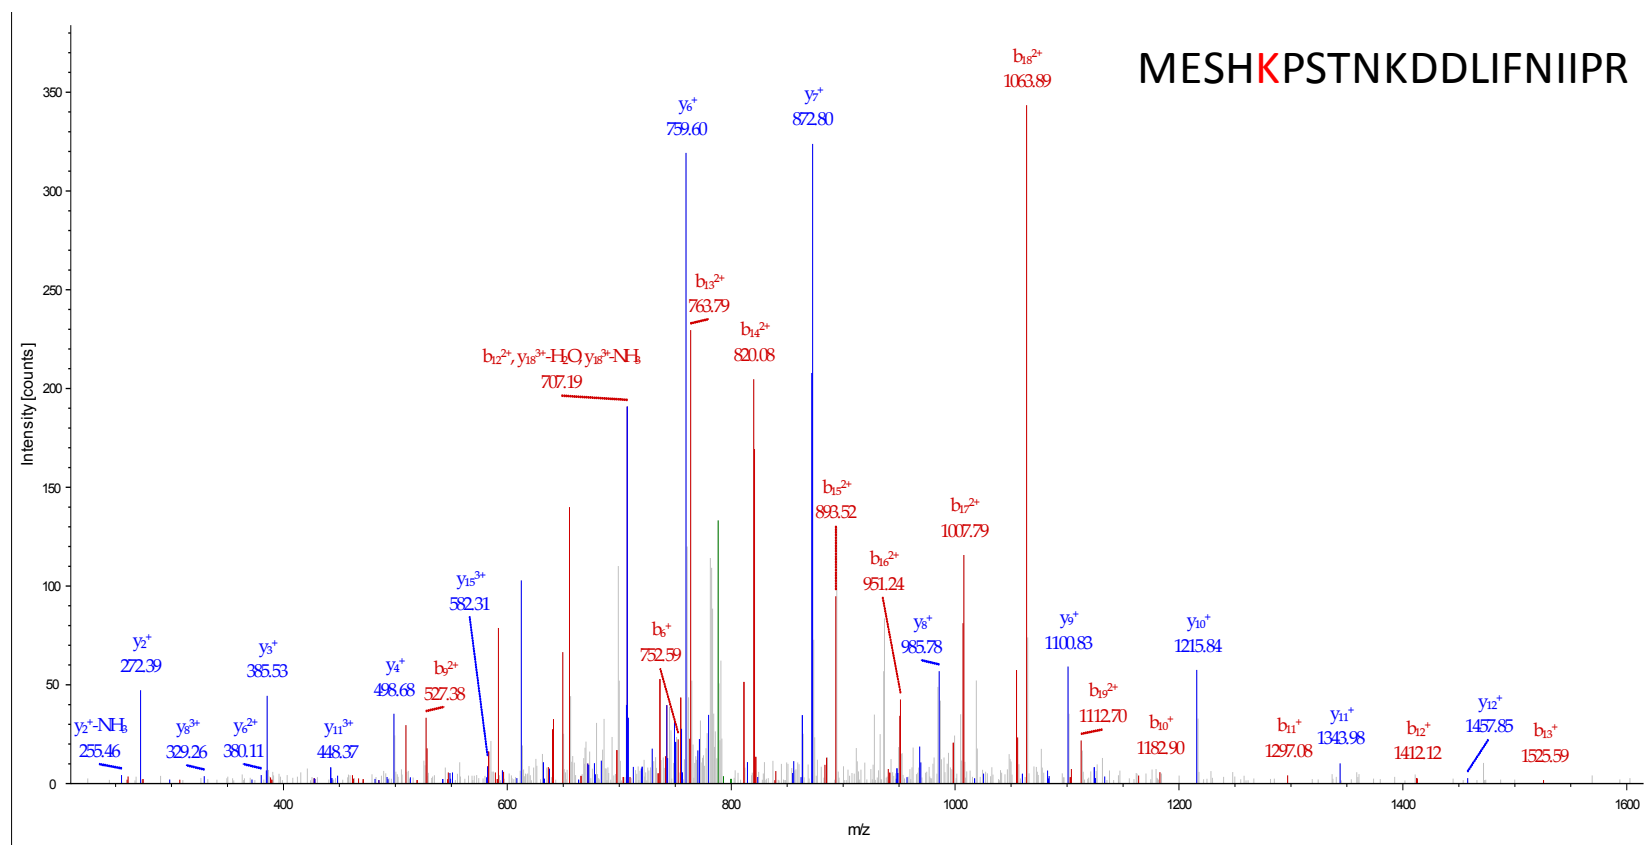

(9)

Figure S1. Cont.

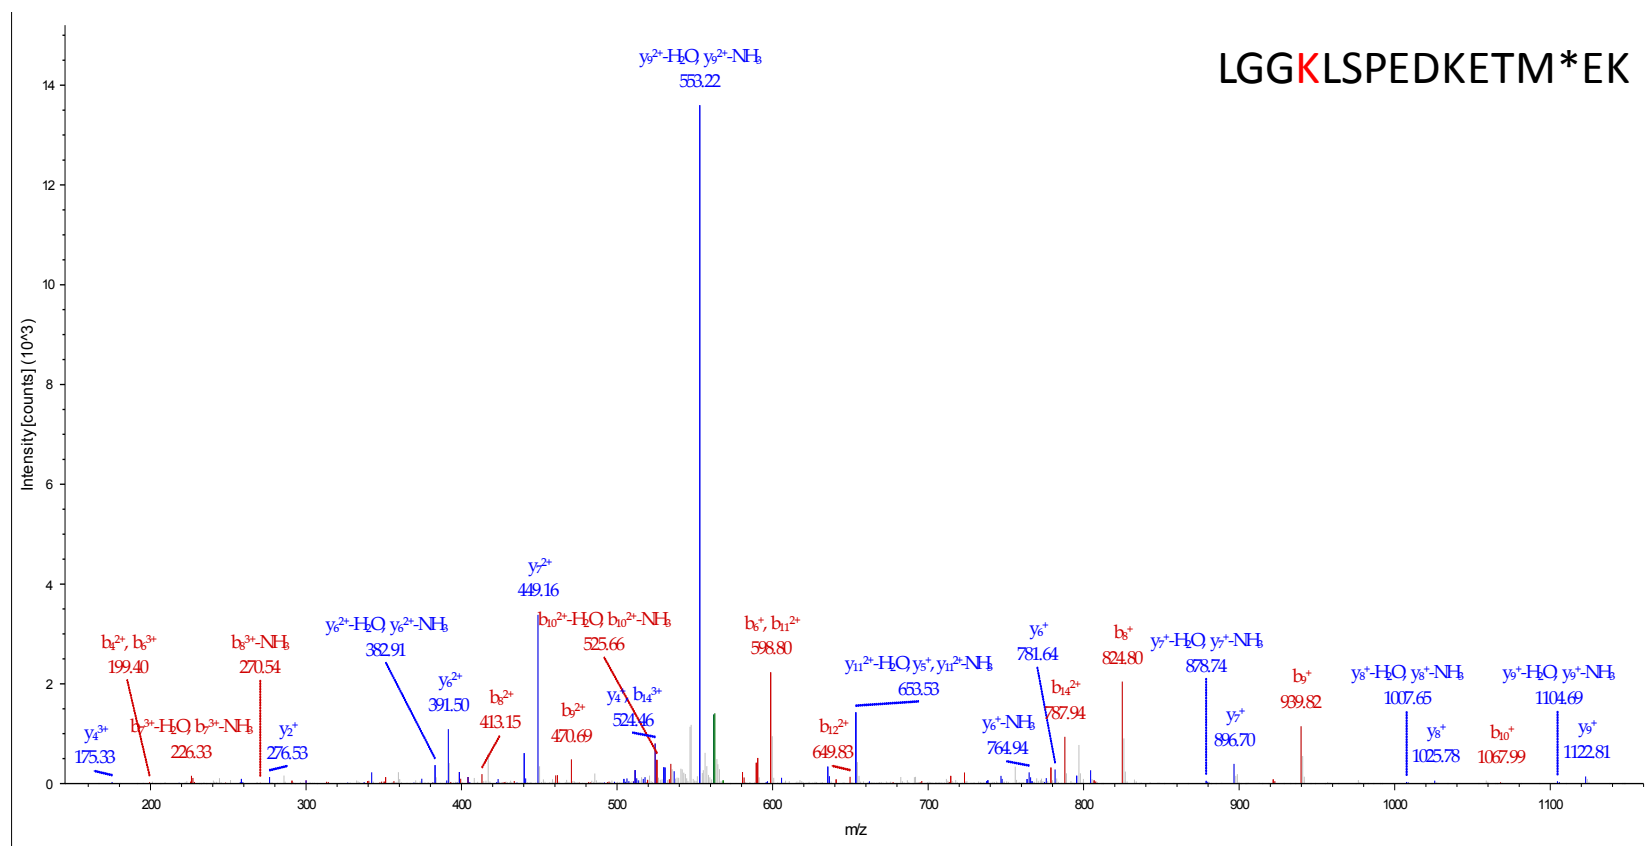

(10)

**Figure S1. Cont.**

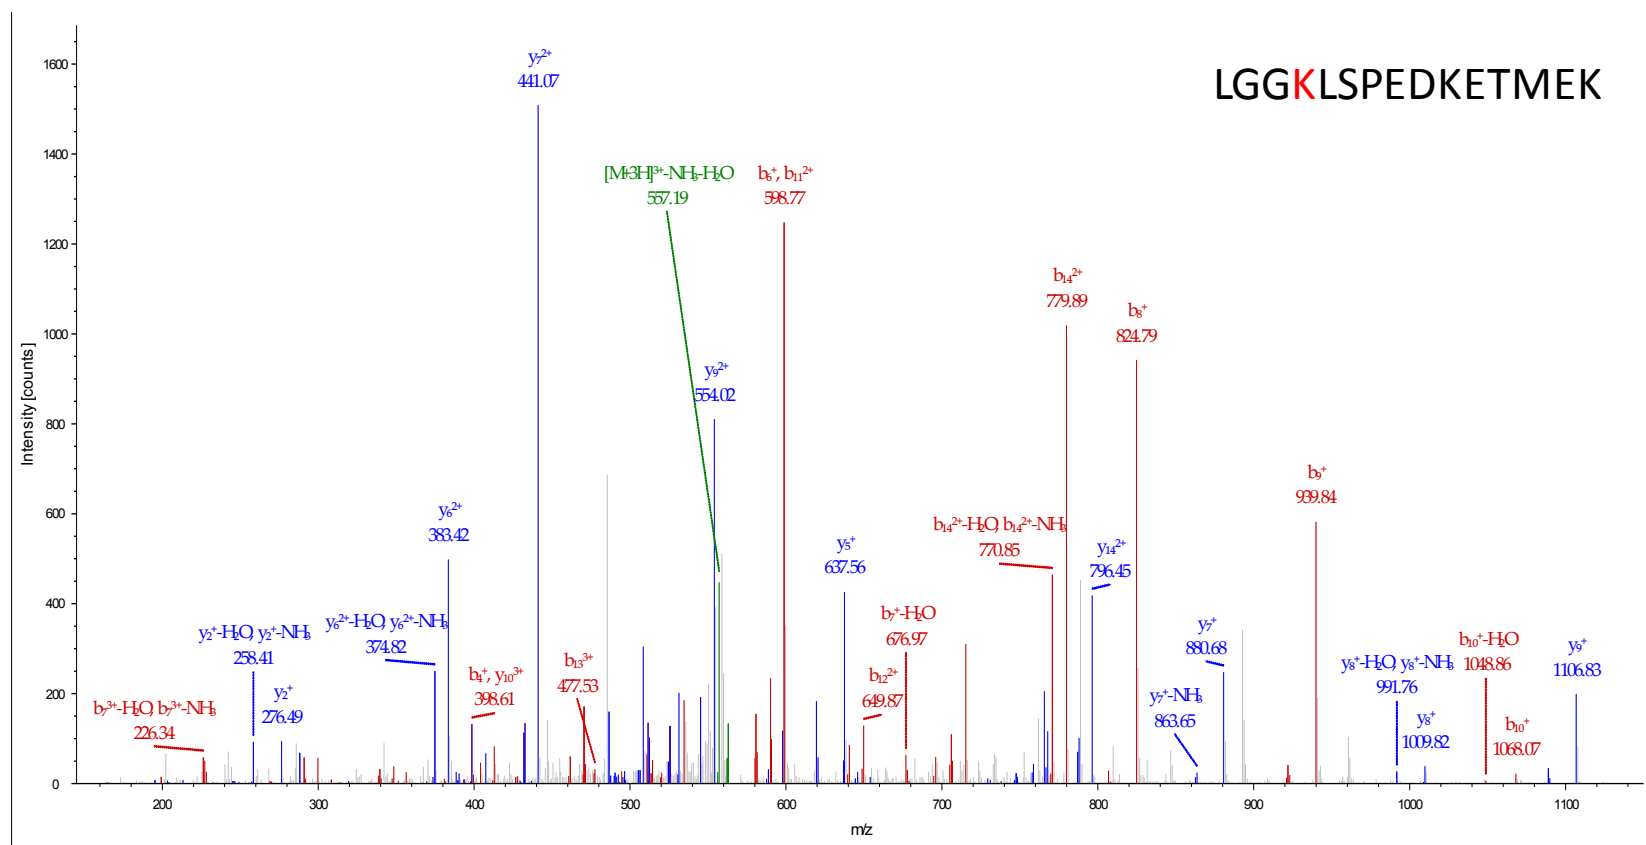

(11)

Figure S1. Cont.

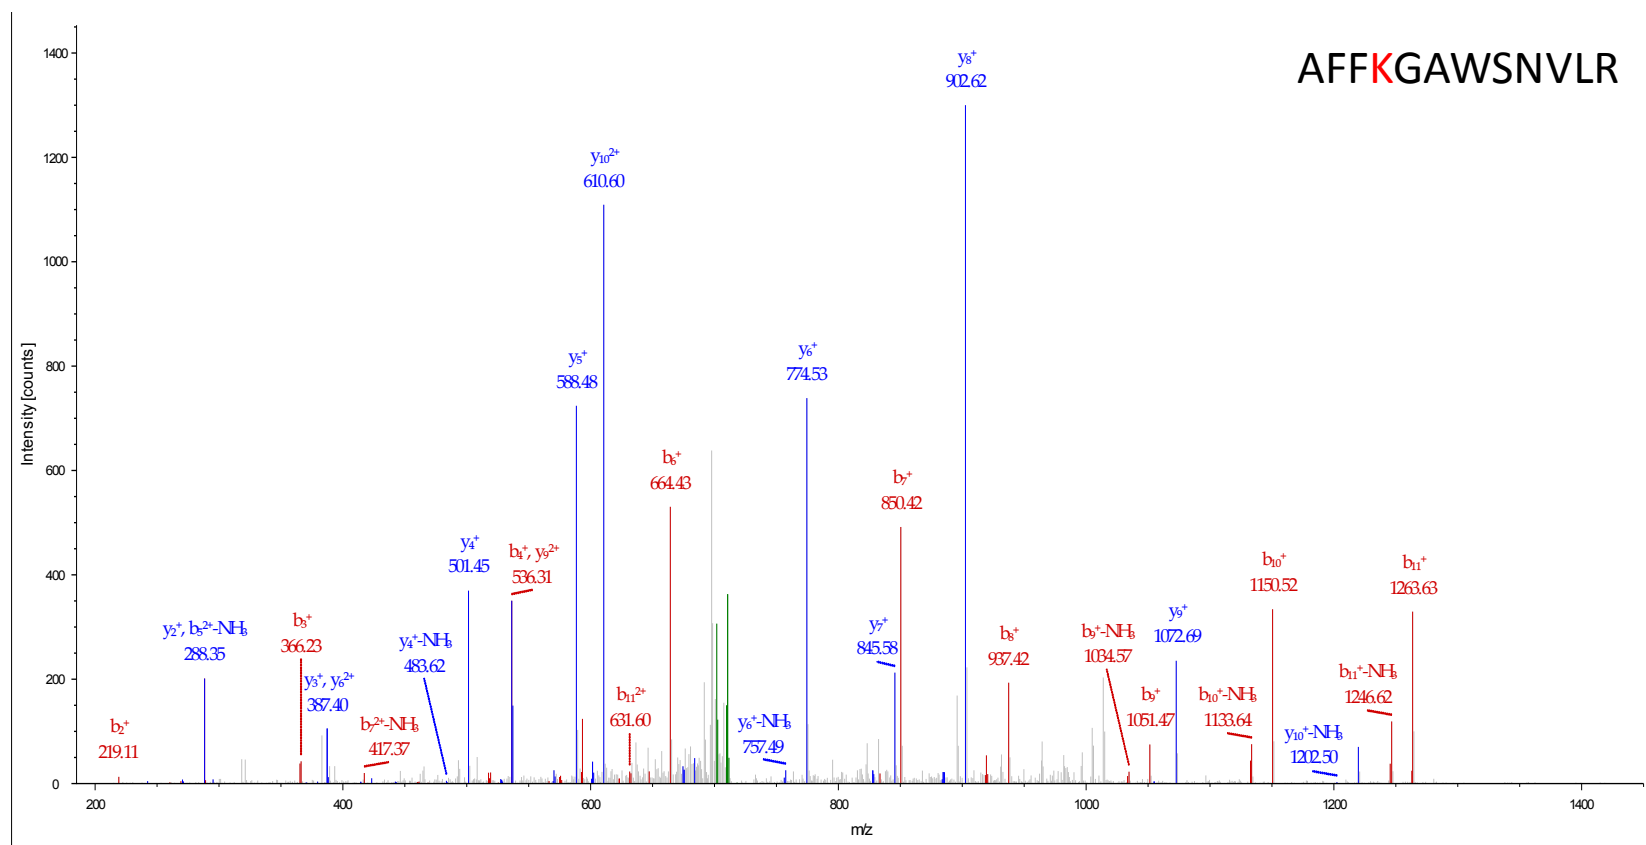

(12)

Figure S1. Cont.

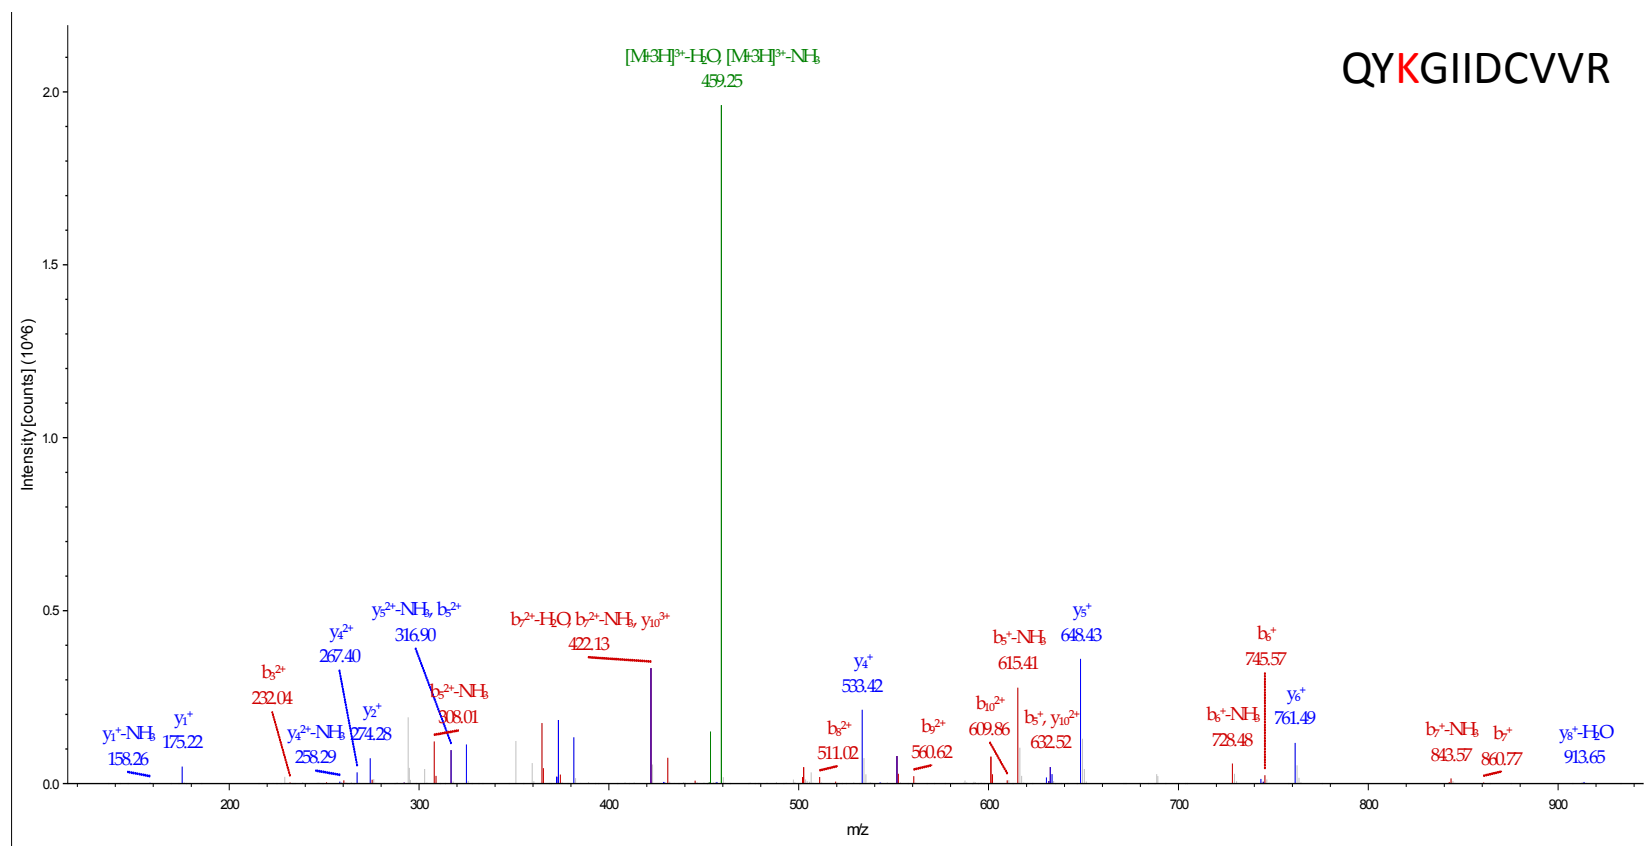

(13)

Figure S1. Cont.

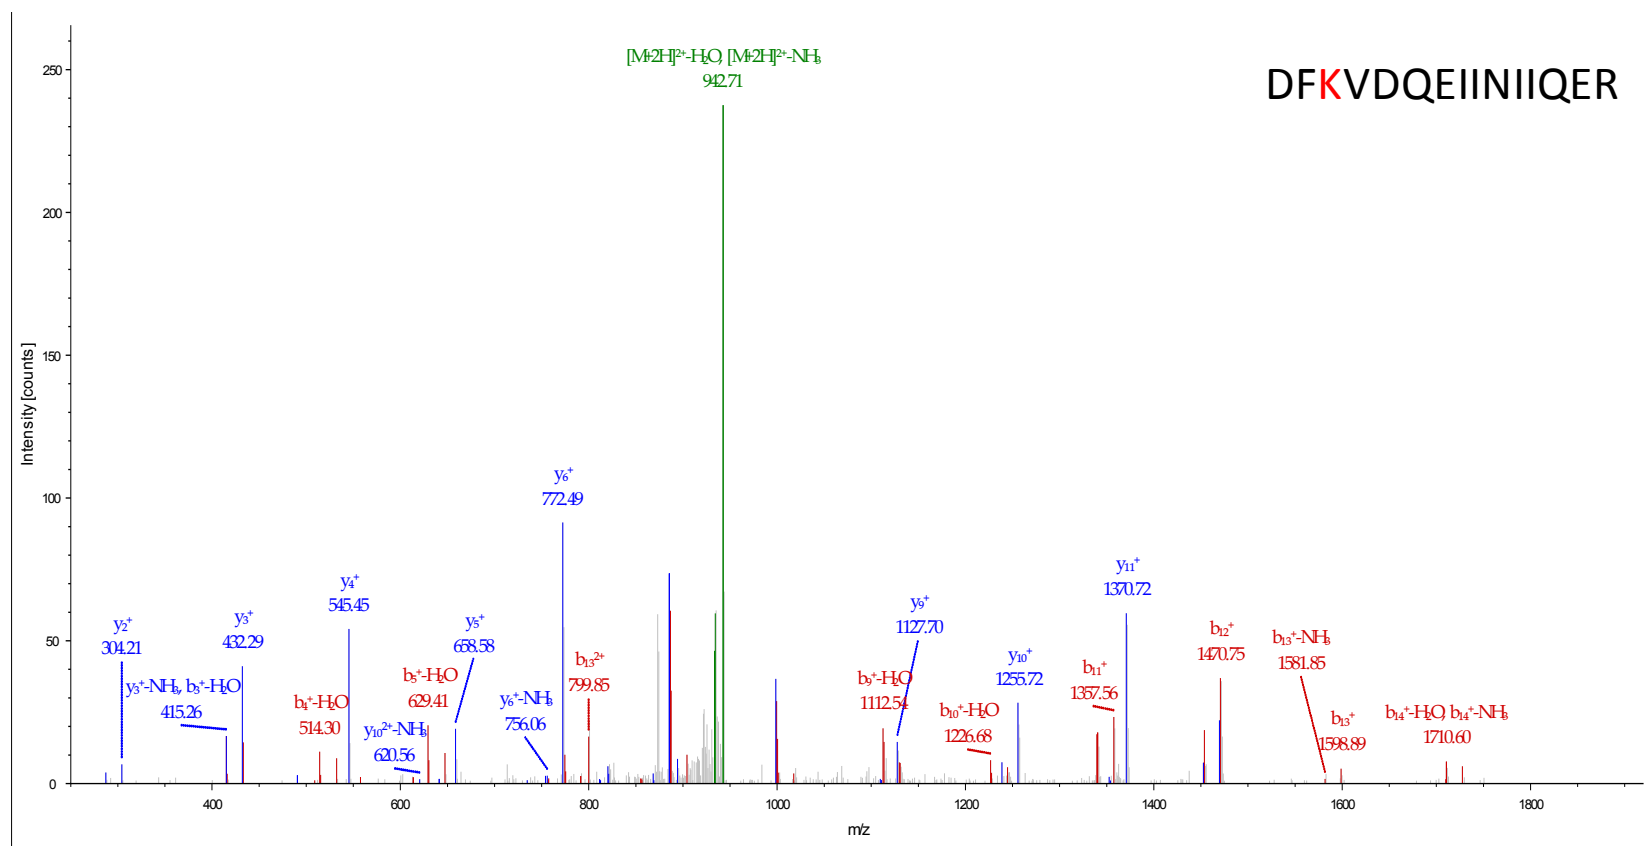

(14)

Figure S1. Cont.

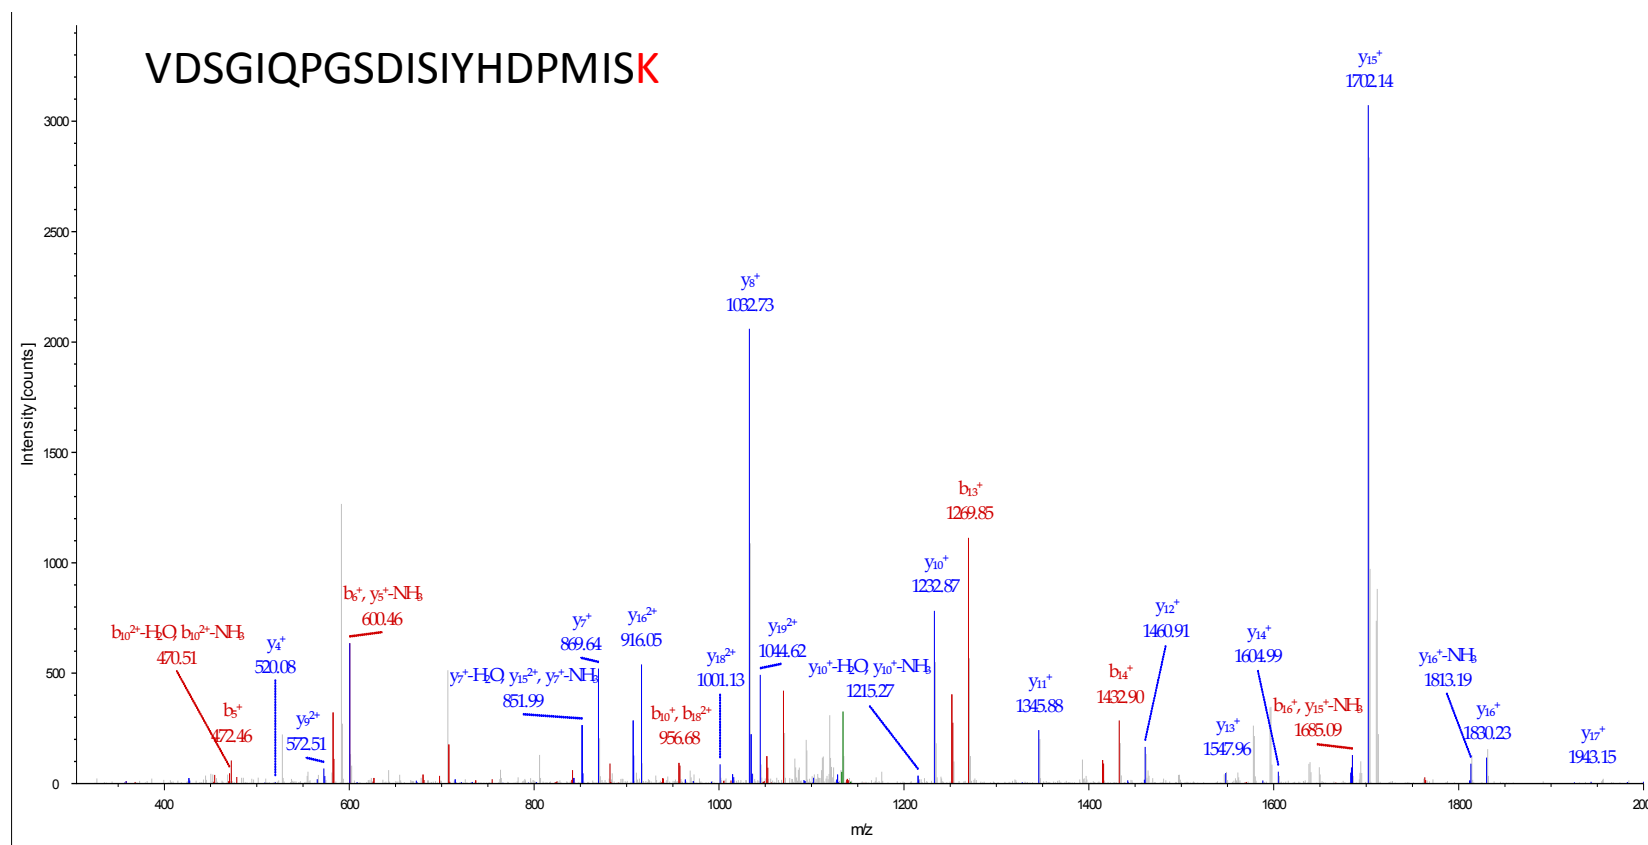

(15)

Figure S1. Cont.

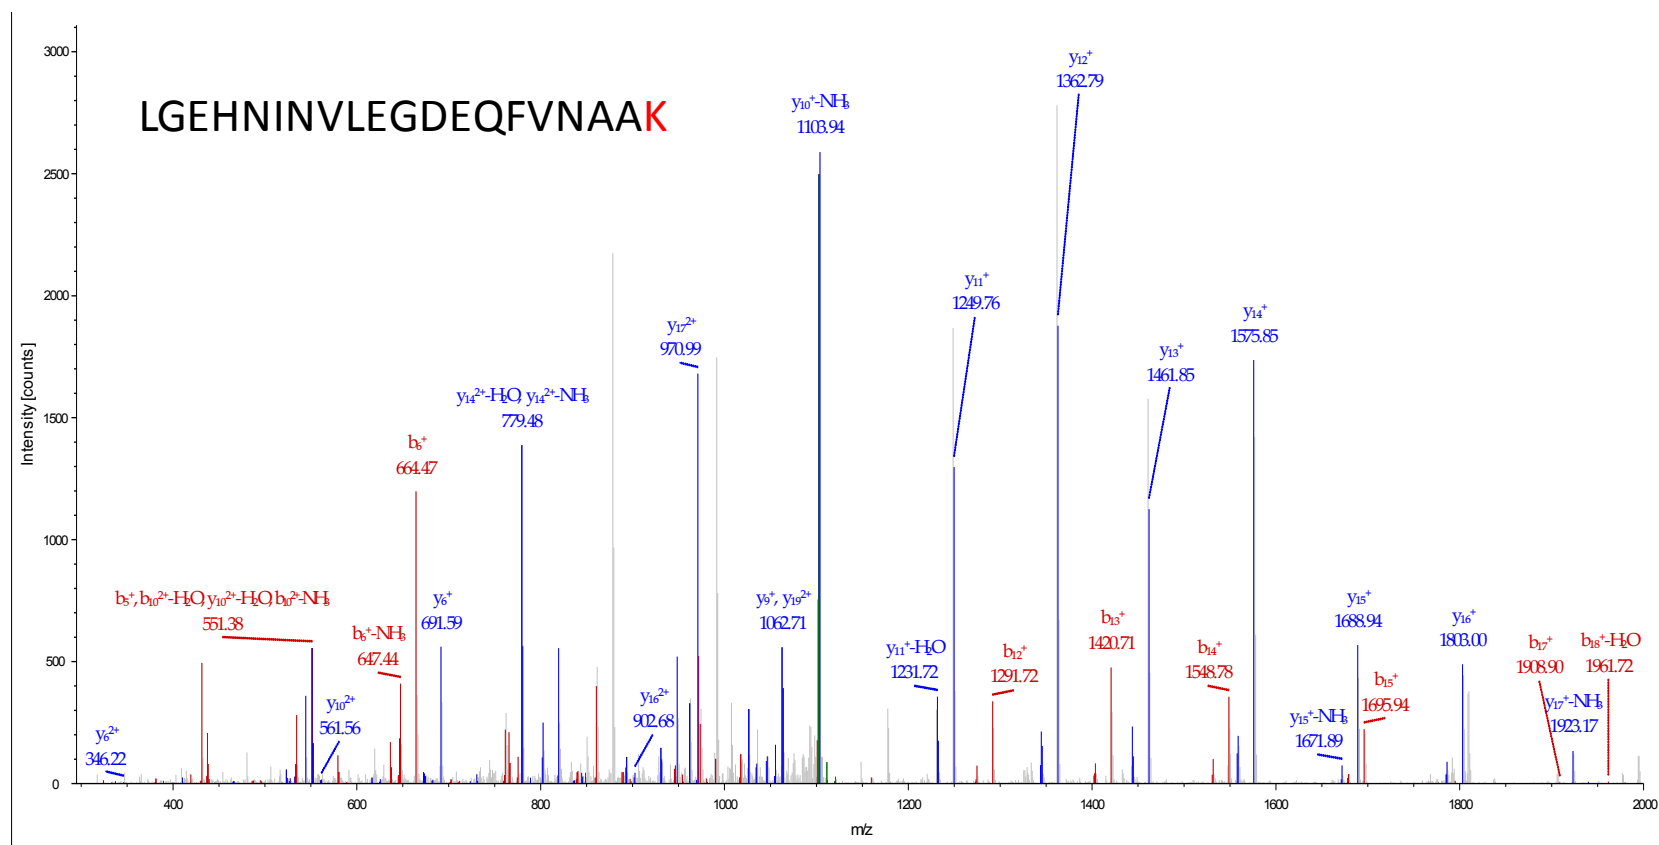

(16)

Figure S1. Cont.

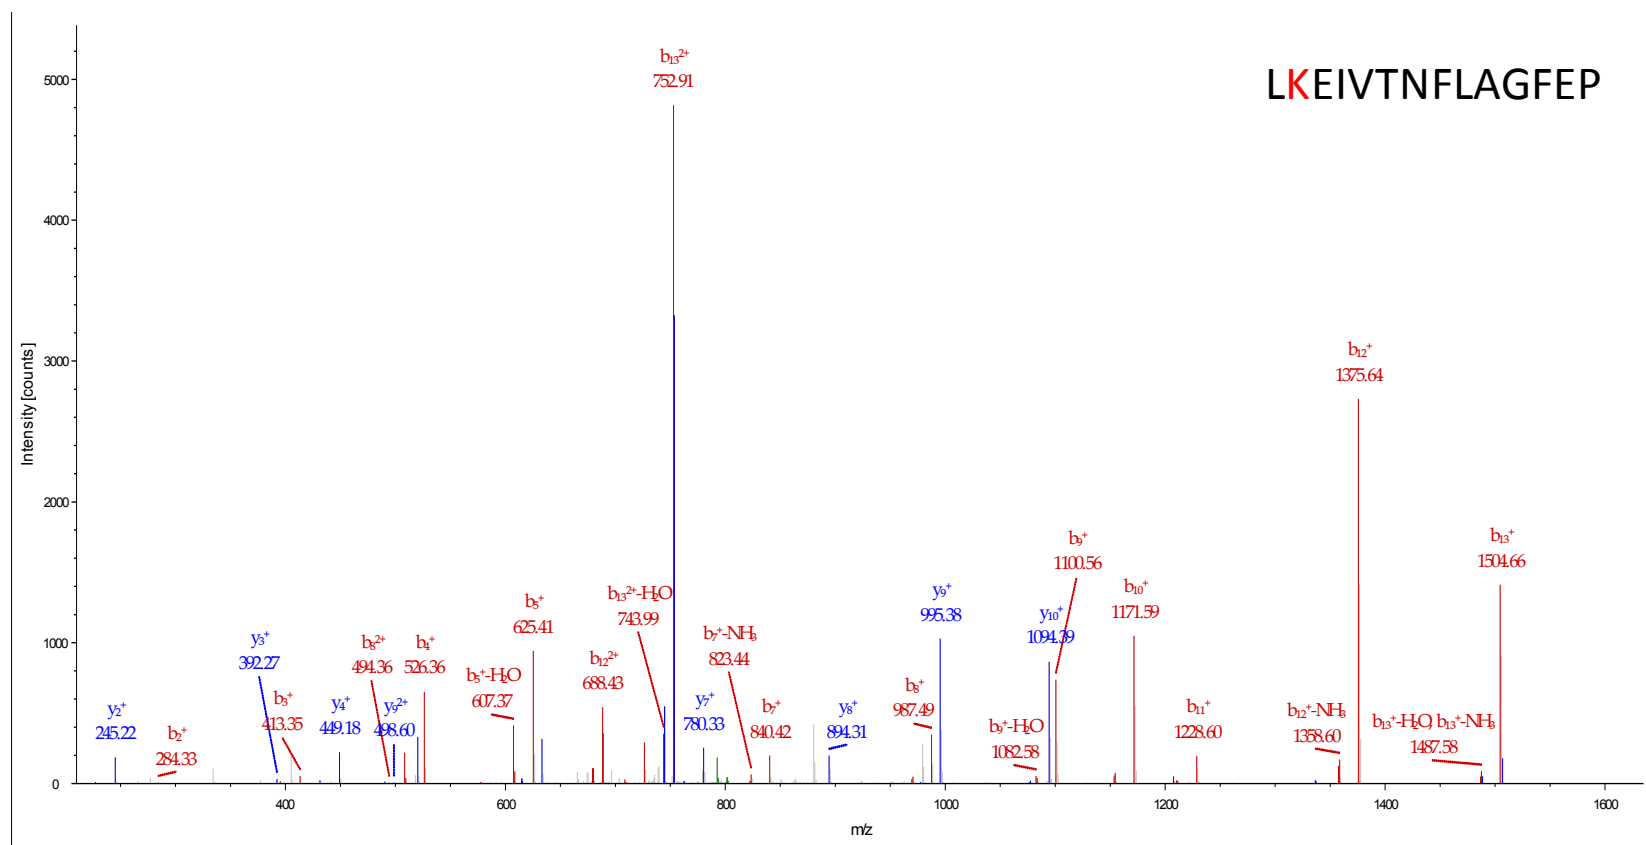

(17)

Figure S1. Cont.

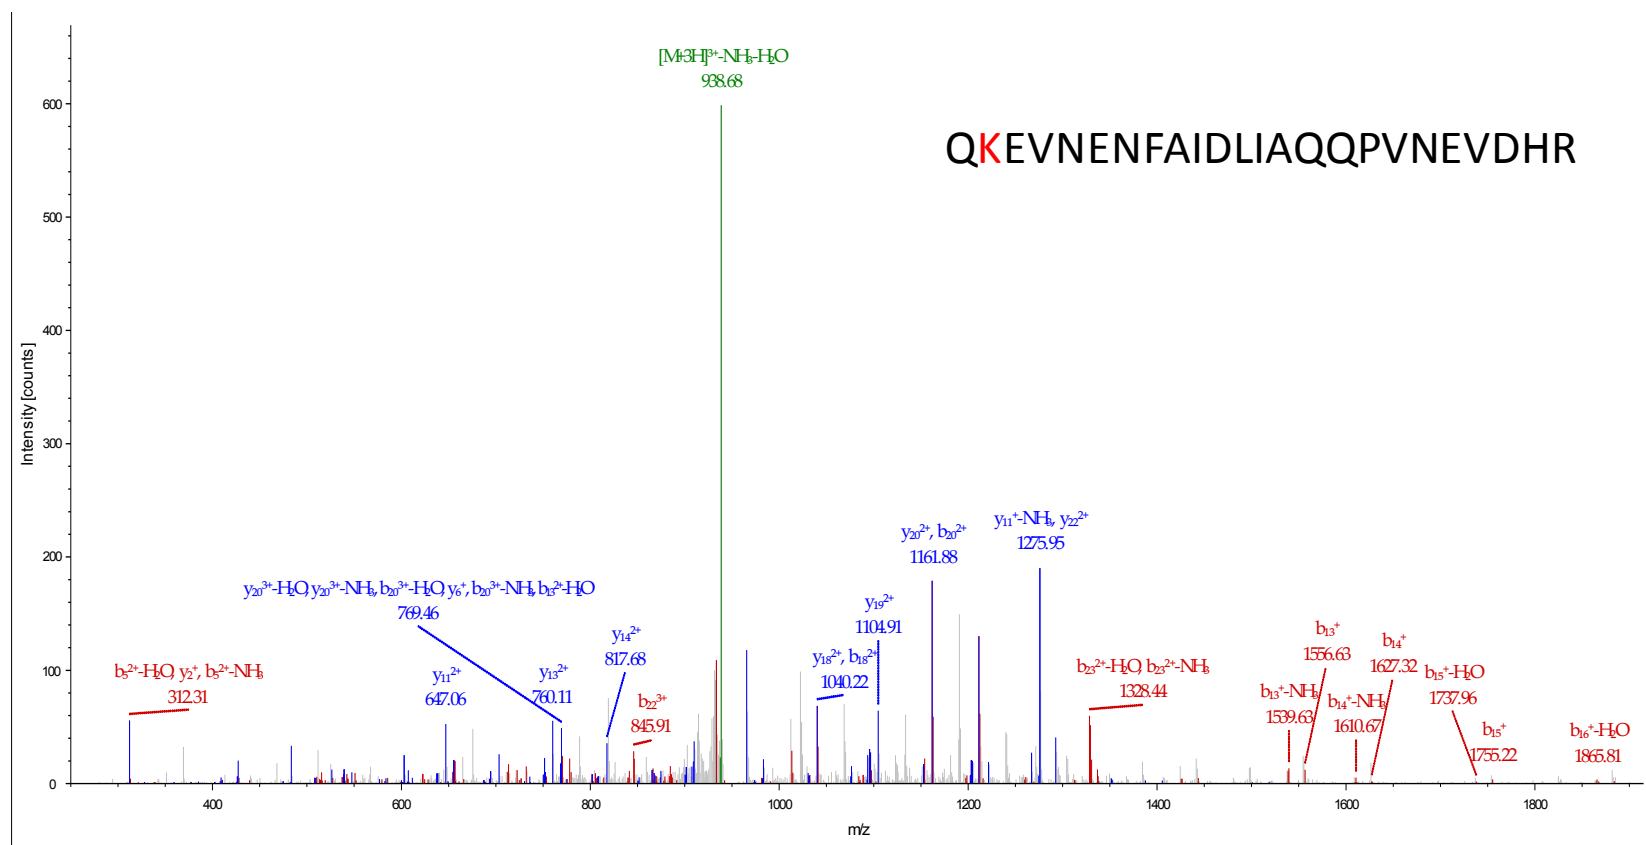

(18)

Figure S1. Cont.

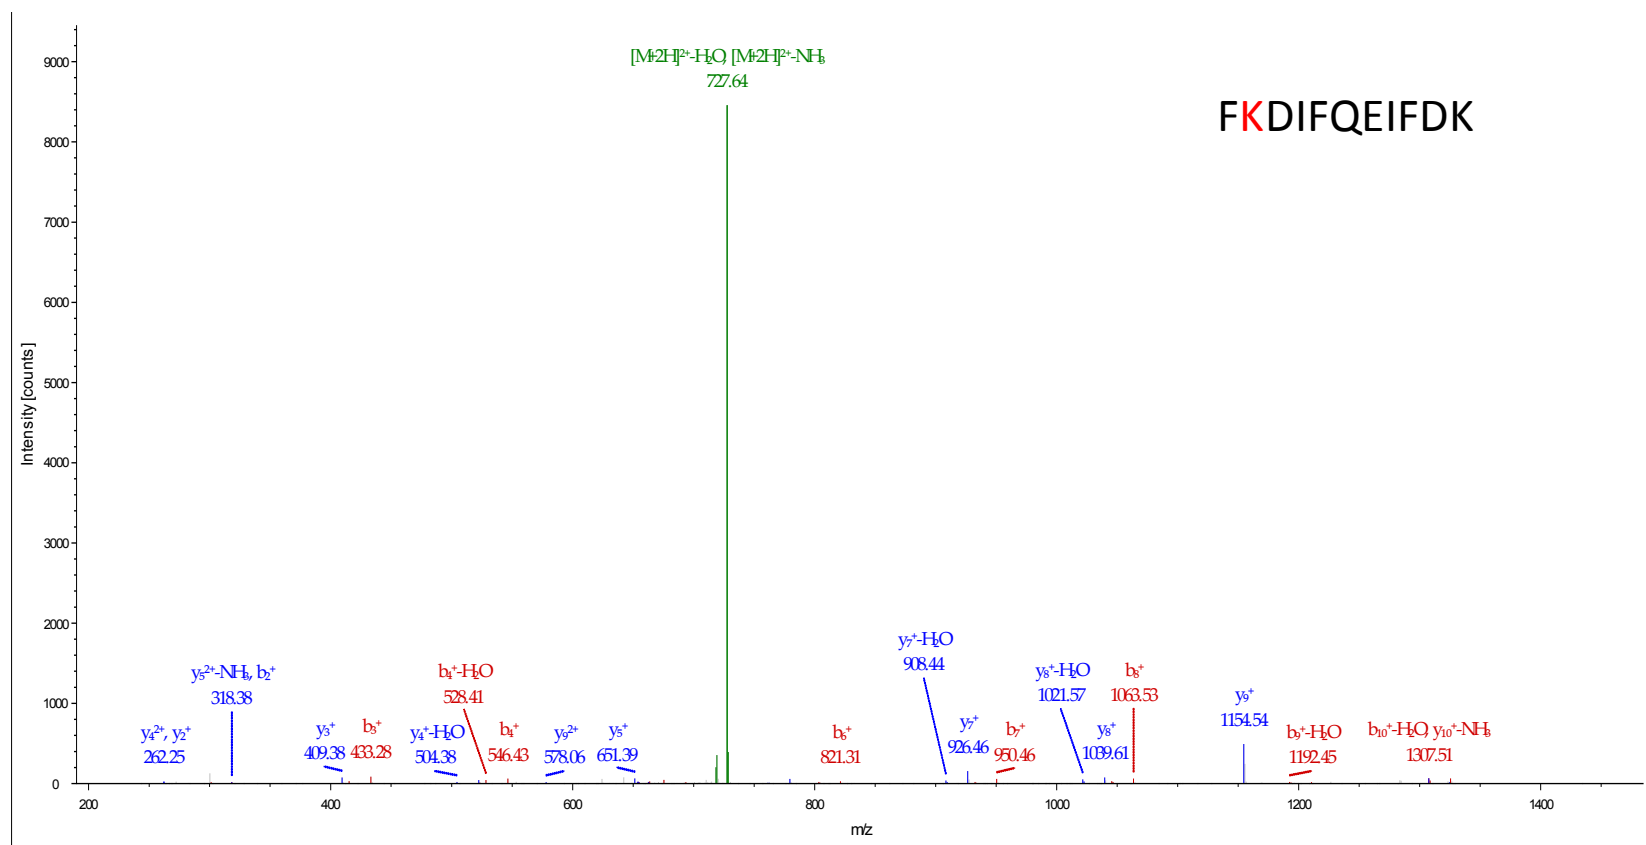

(19)

Figure S1. Cont.

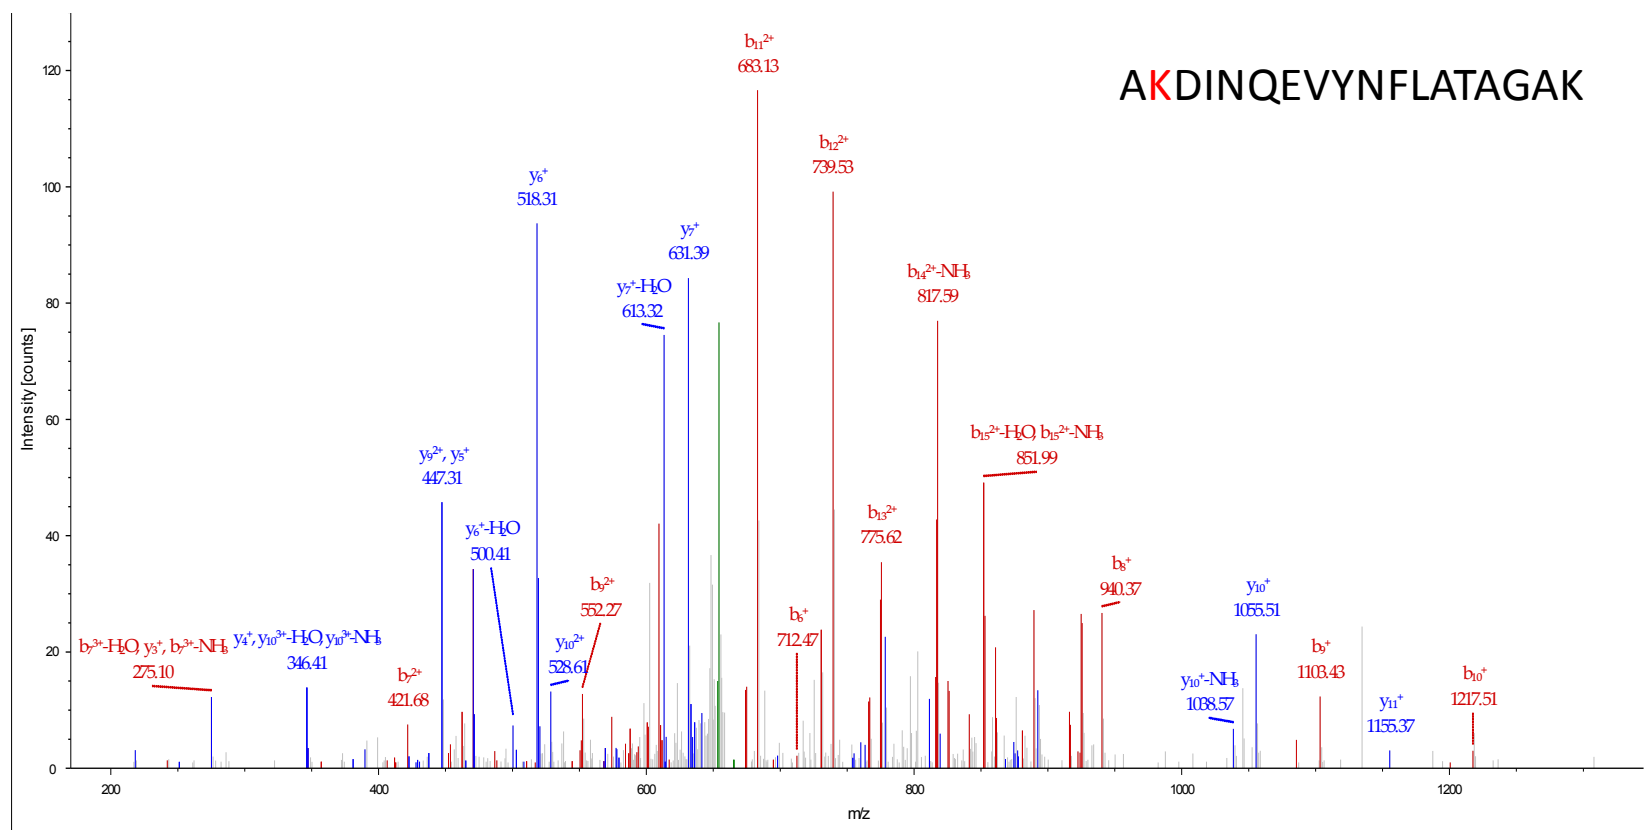

(20)

Figure S1. Cont.

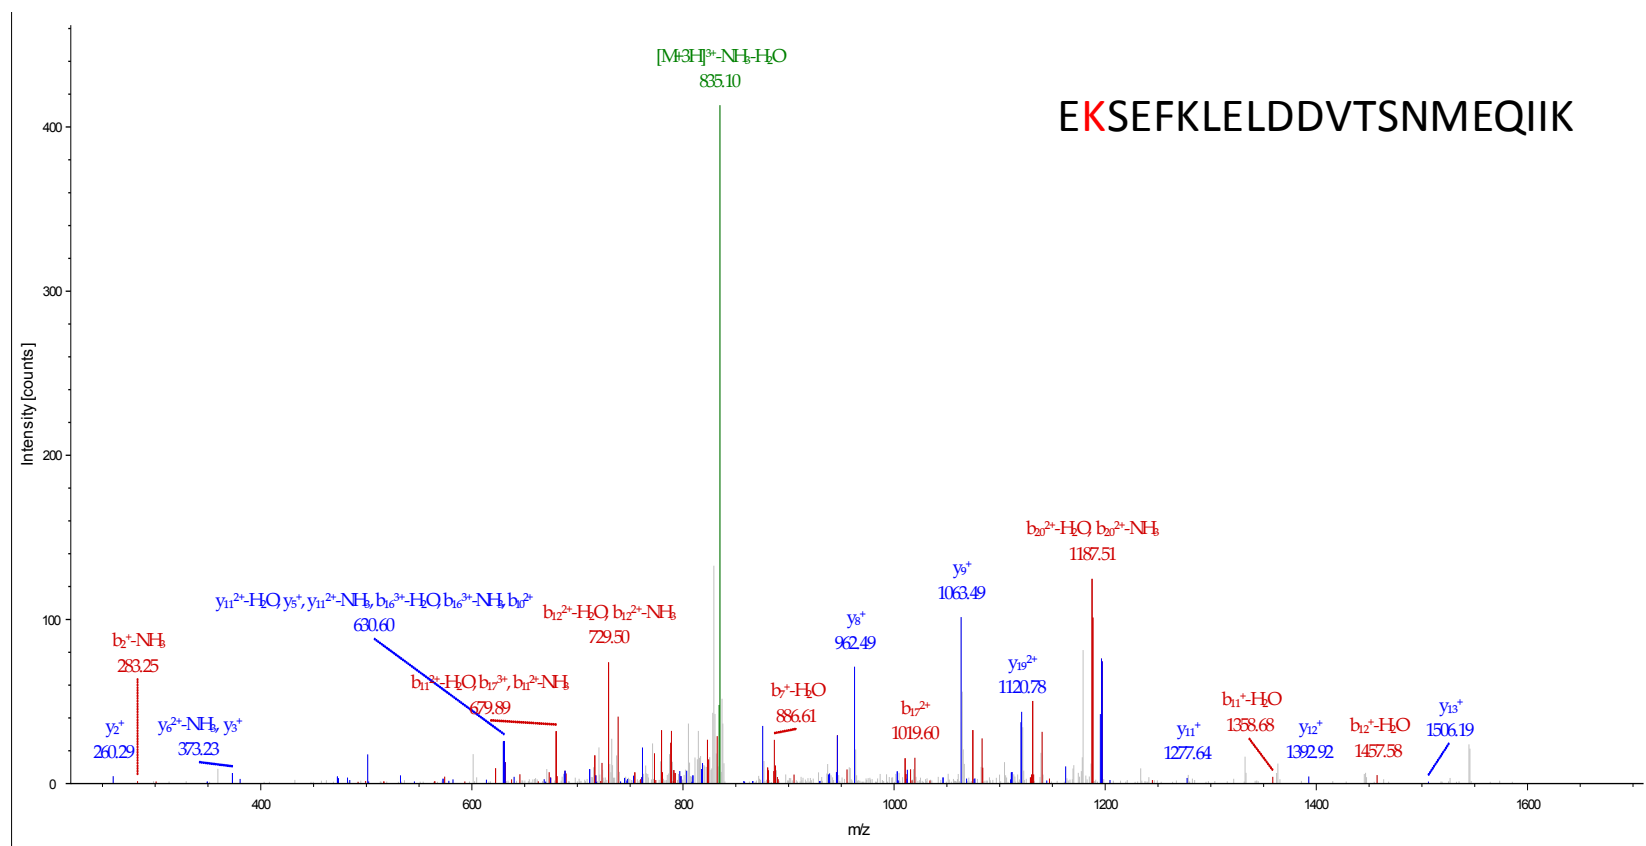

(21)

Figure S1. Cont.

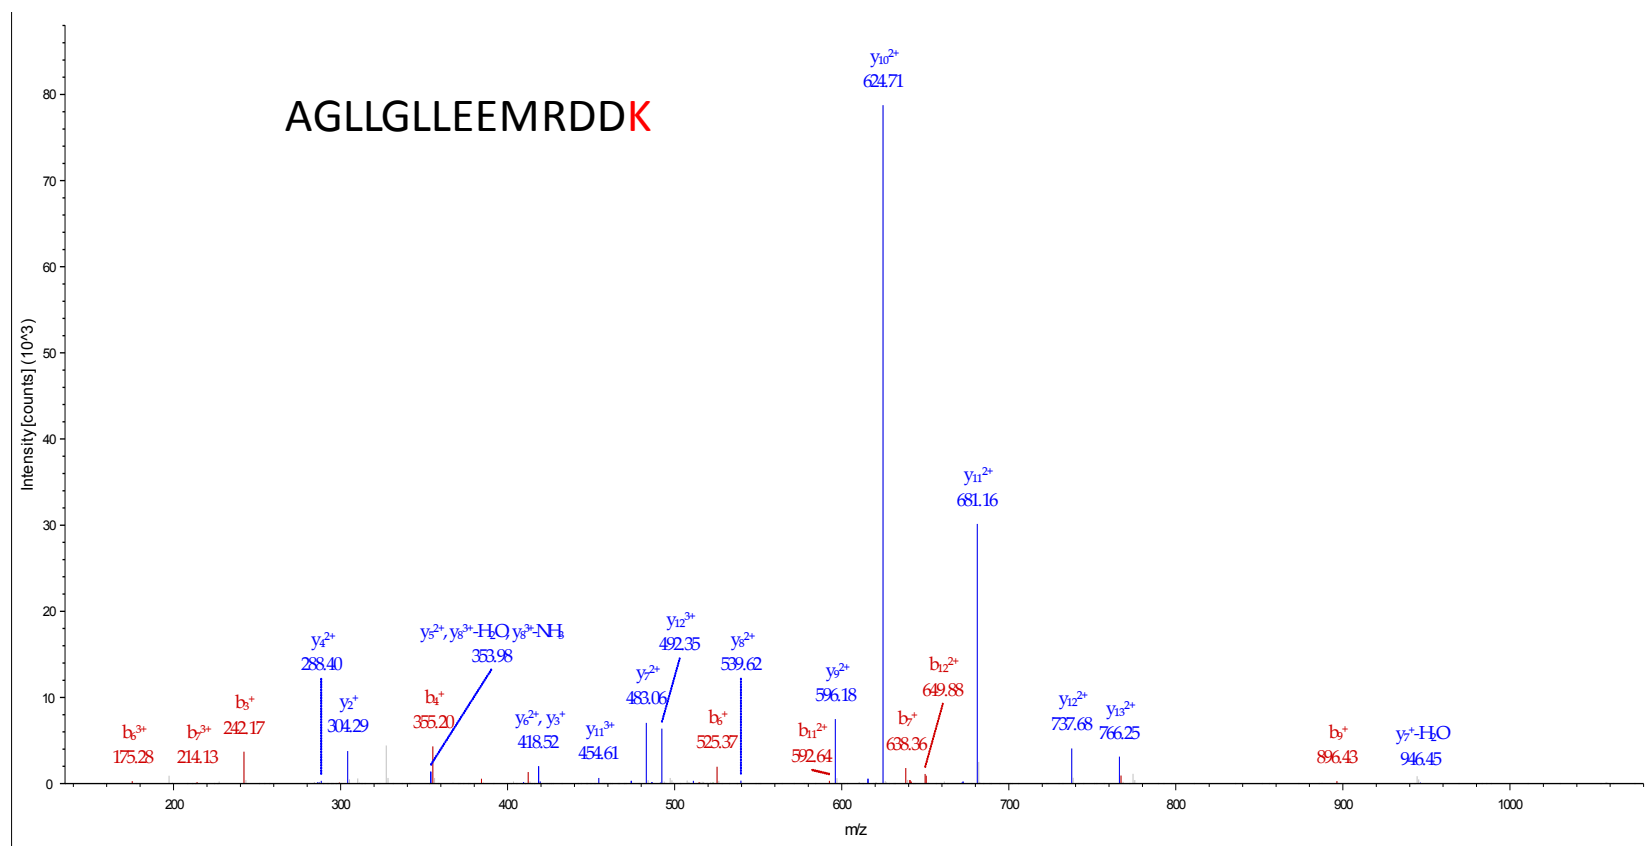

(22)

Figure S1. Cont.

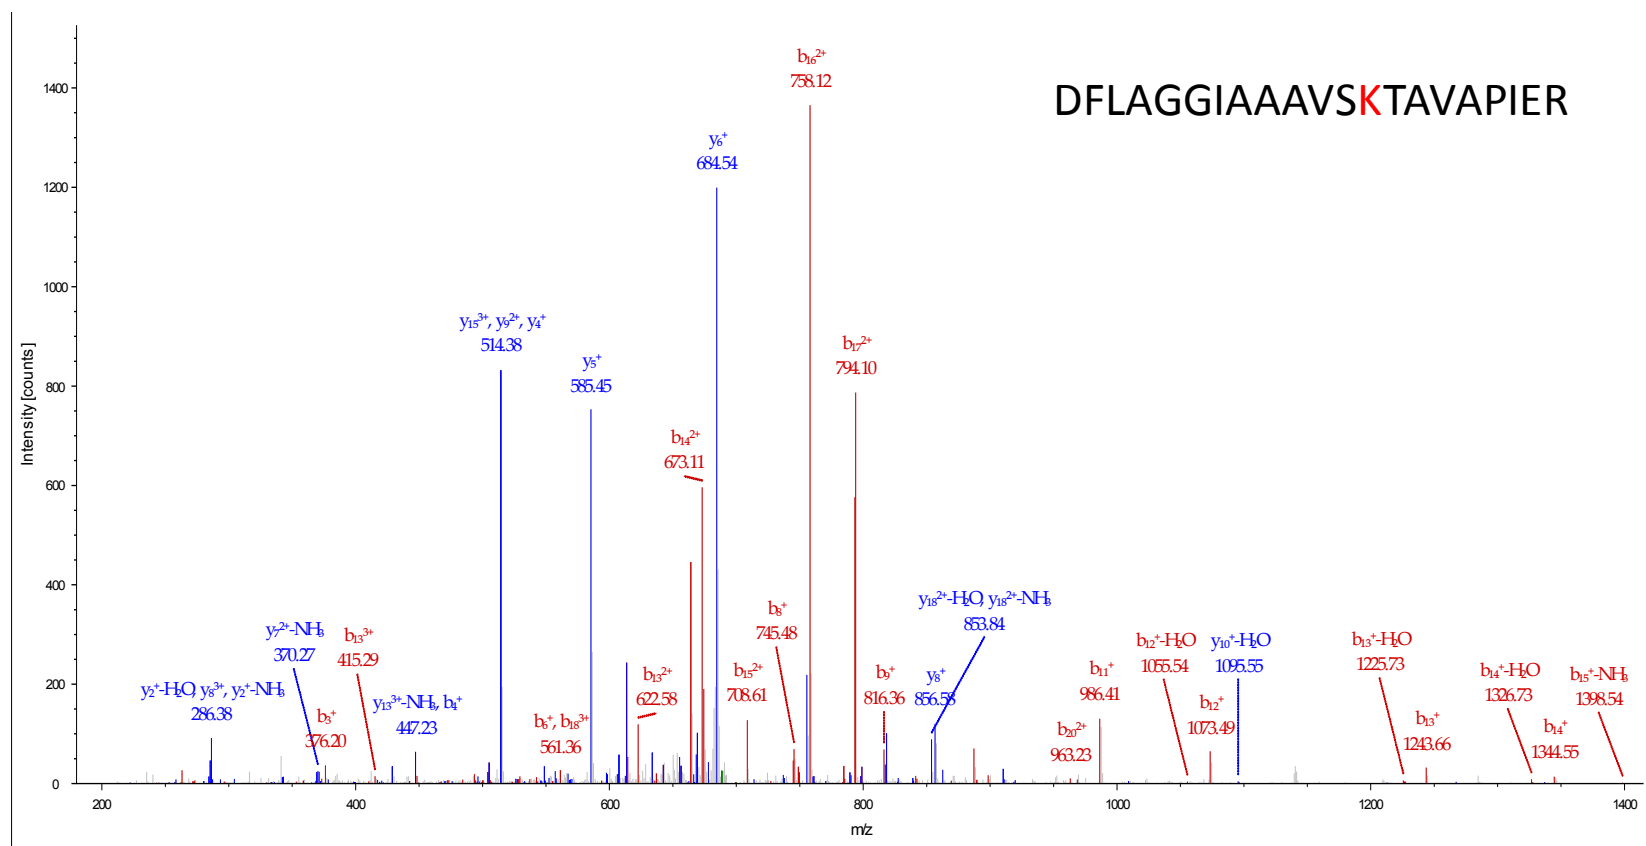

(23)

Figure S1. Cont.

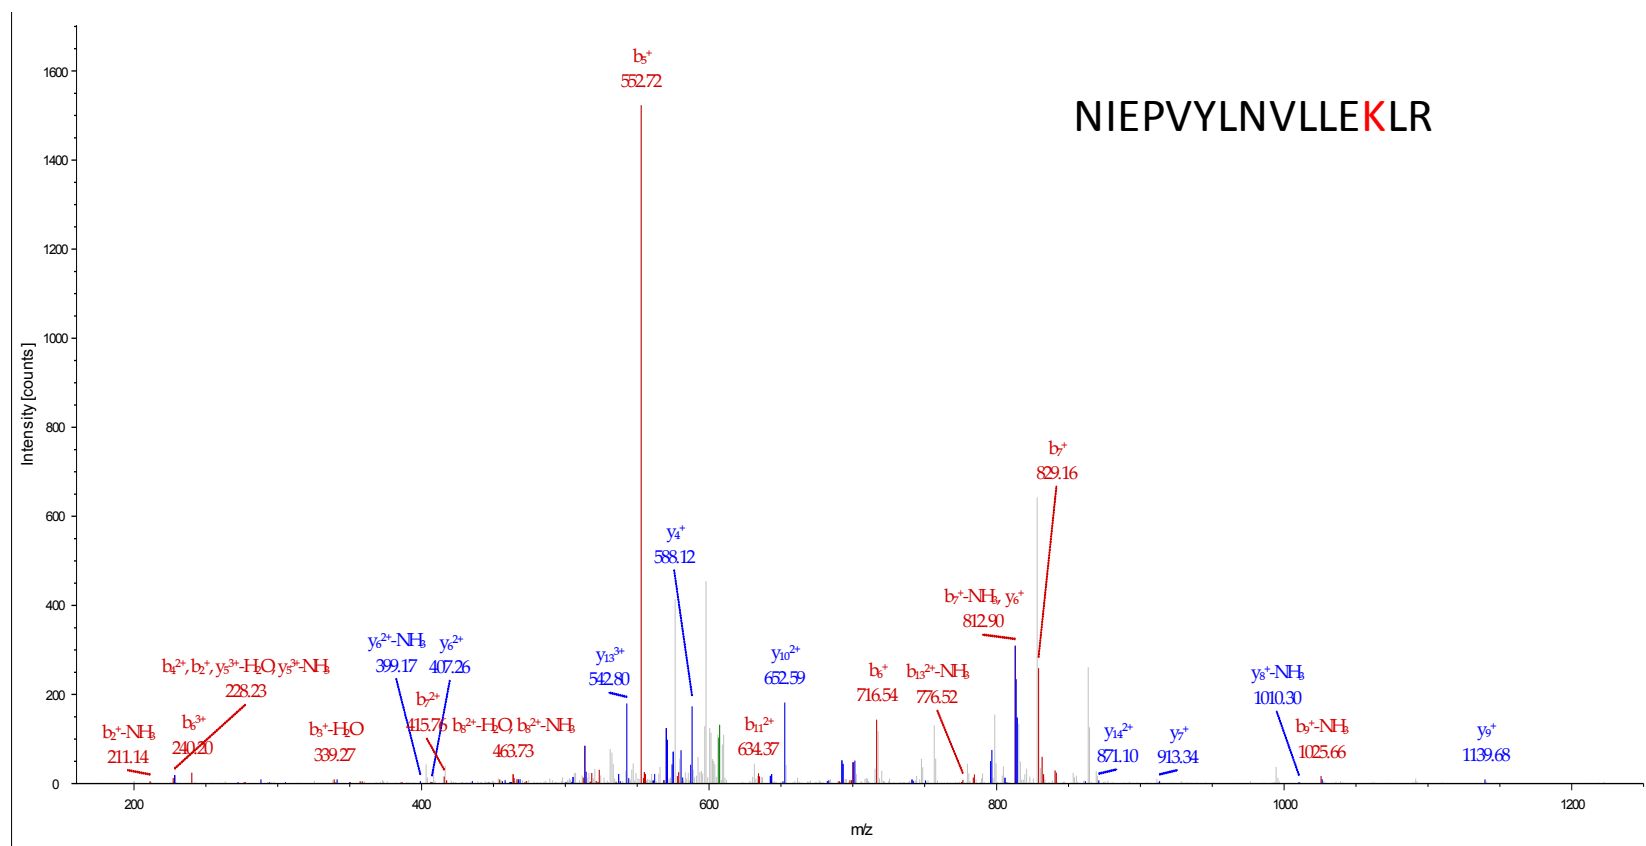

(24)

Figure S1. Cont.

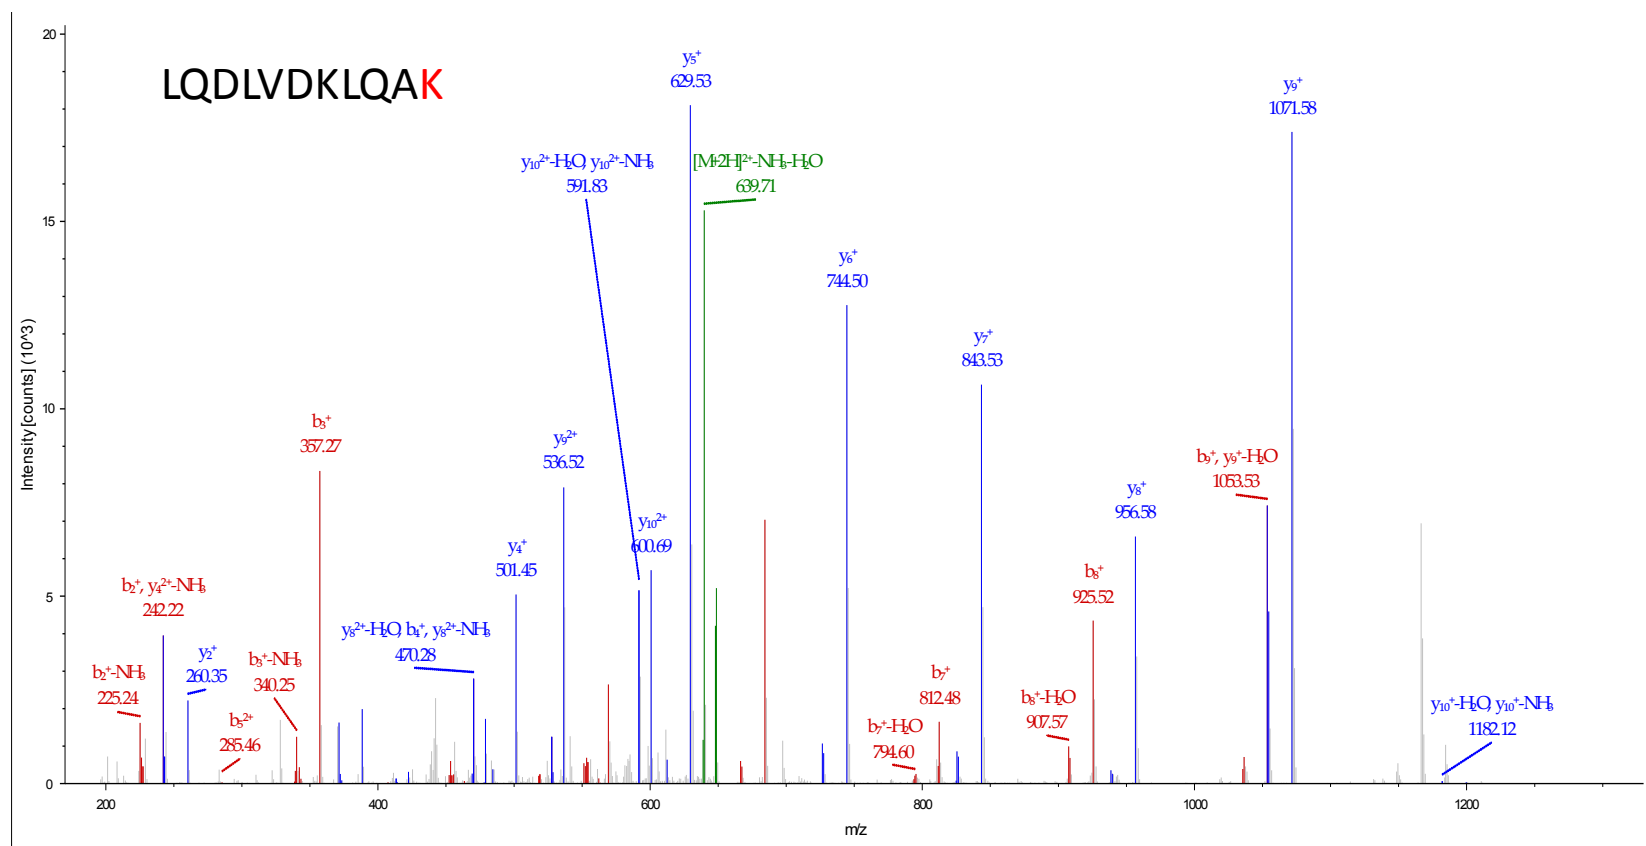

(25)

Figure S1. Cont.

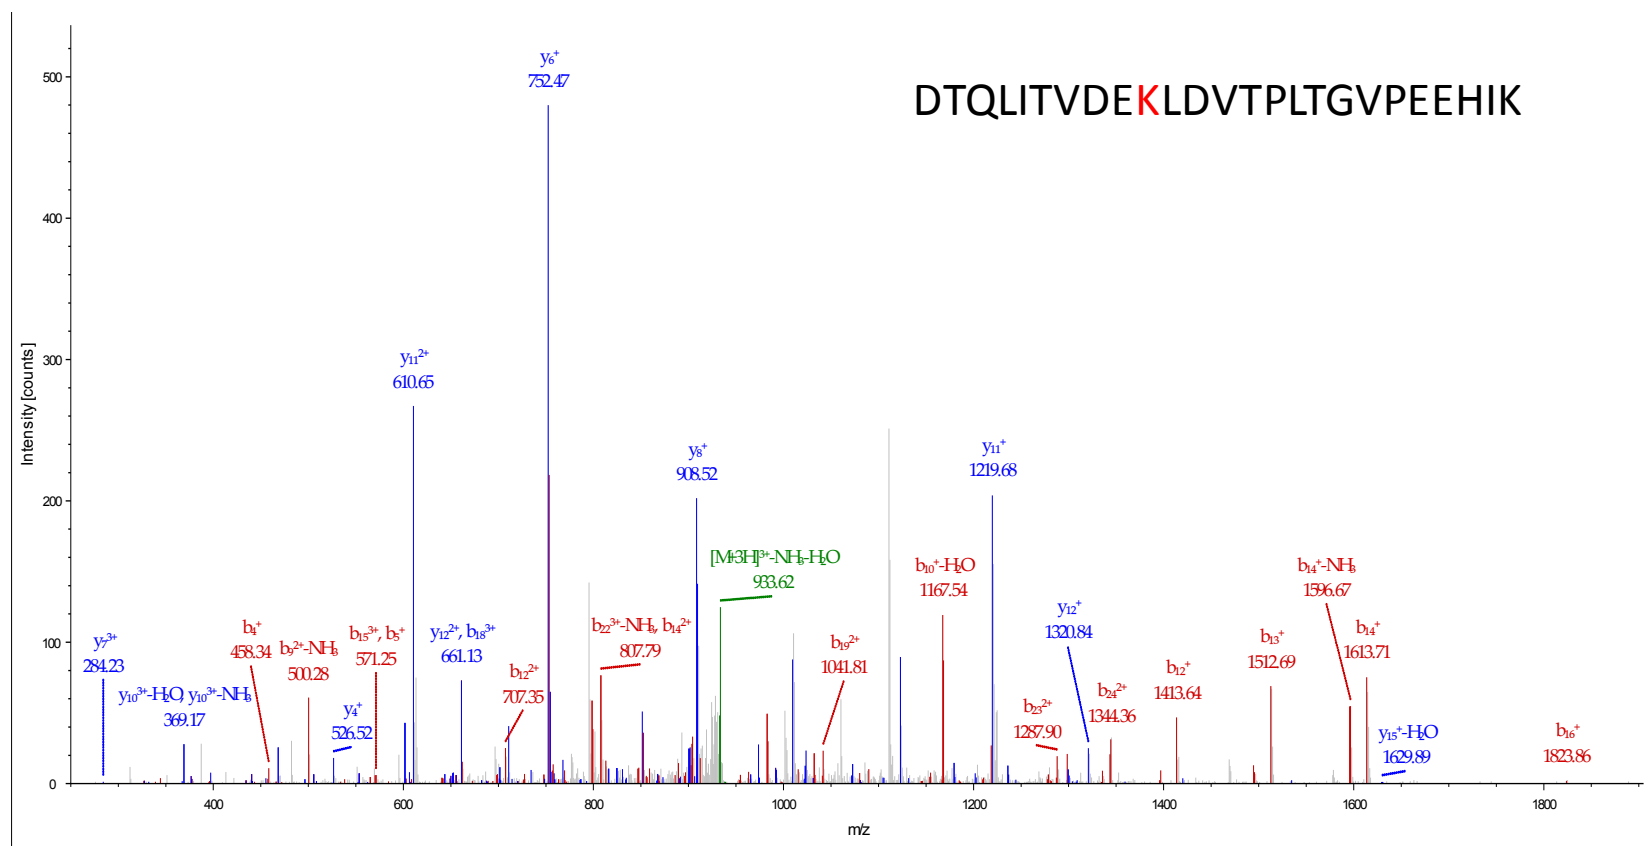

(26)

Figure S1. Cont.

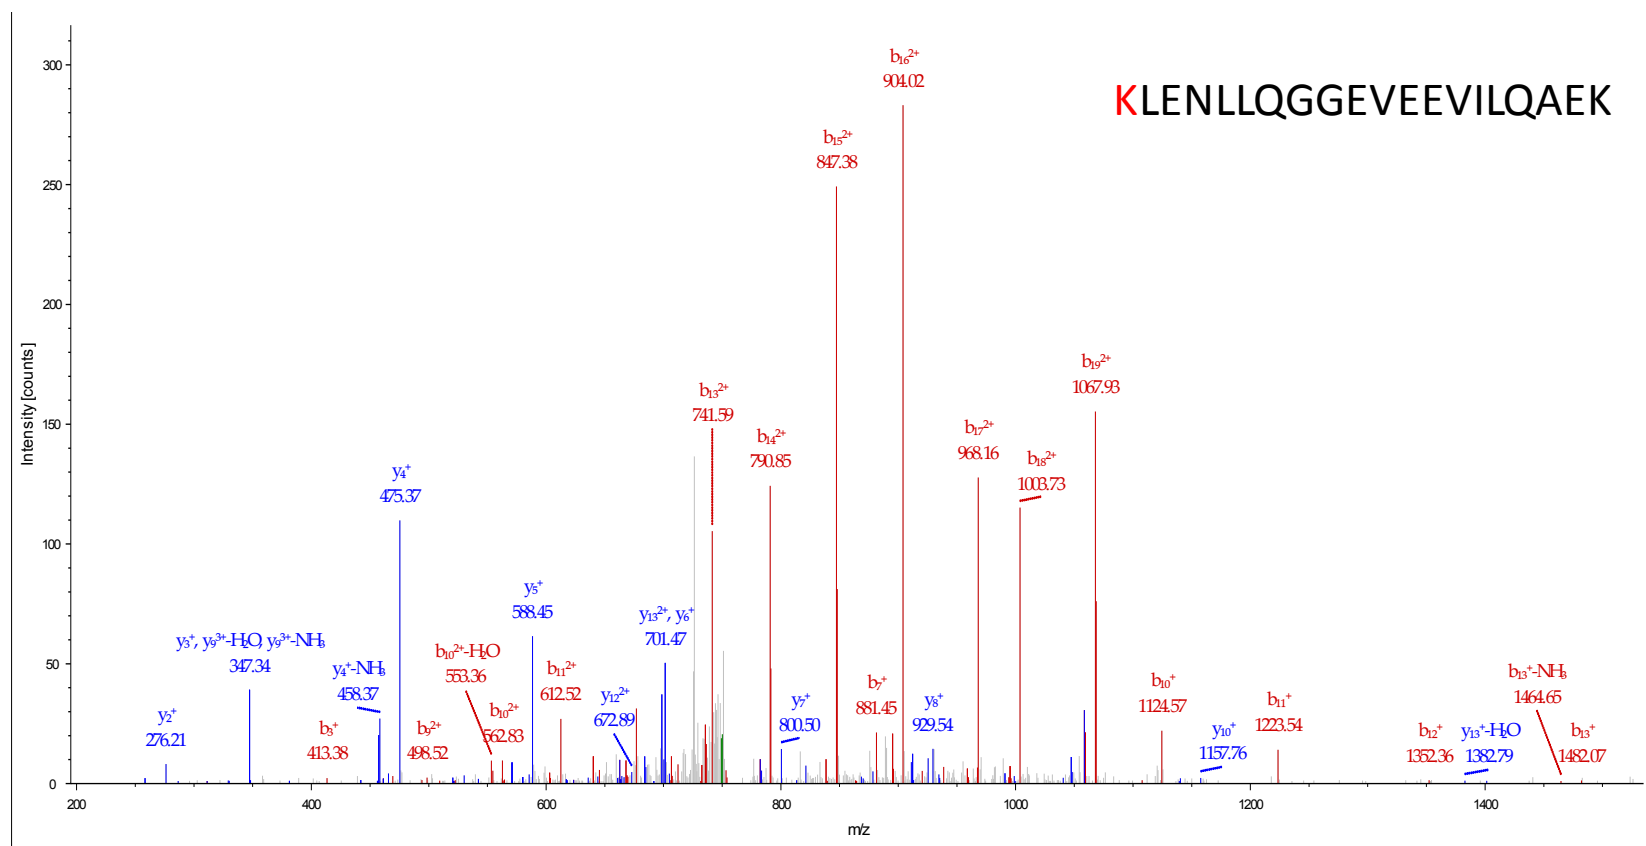

(27)

Figure S1. Cont.

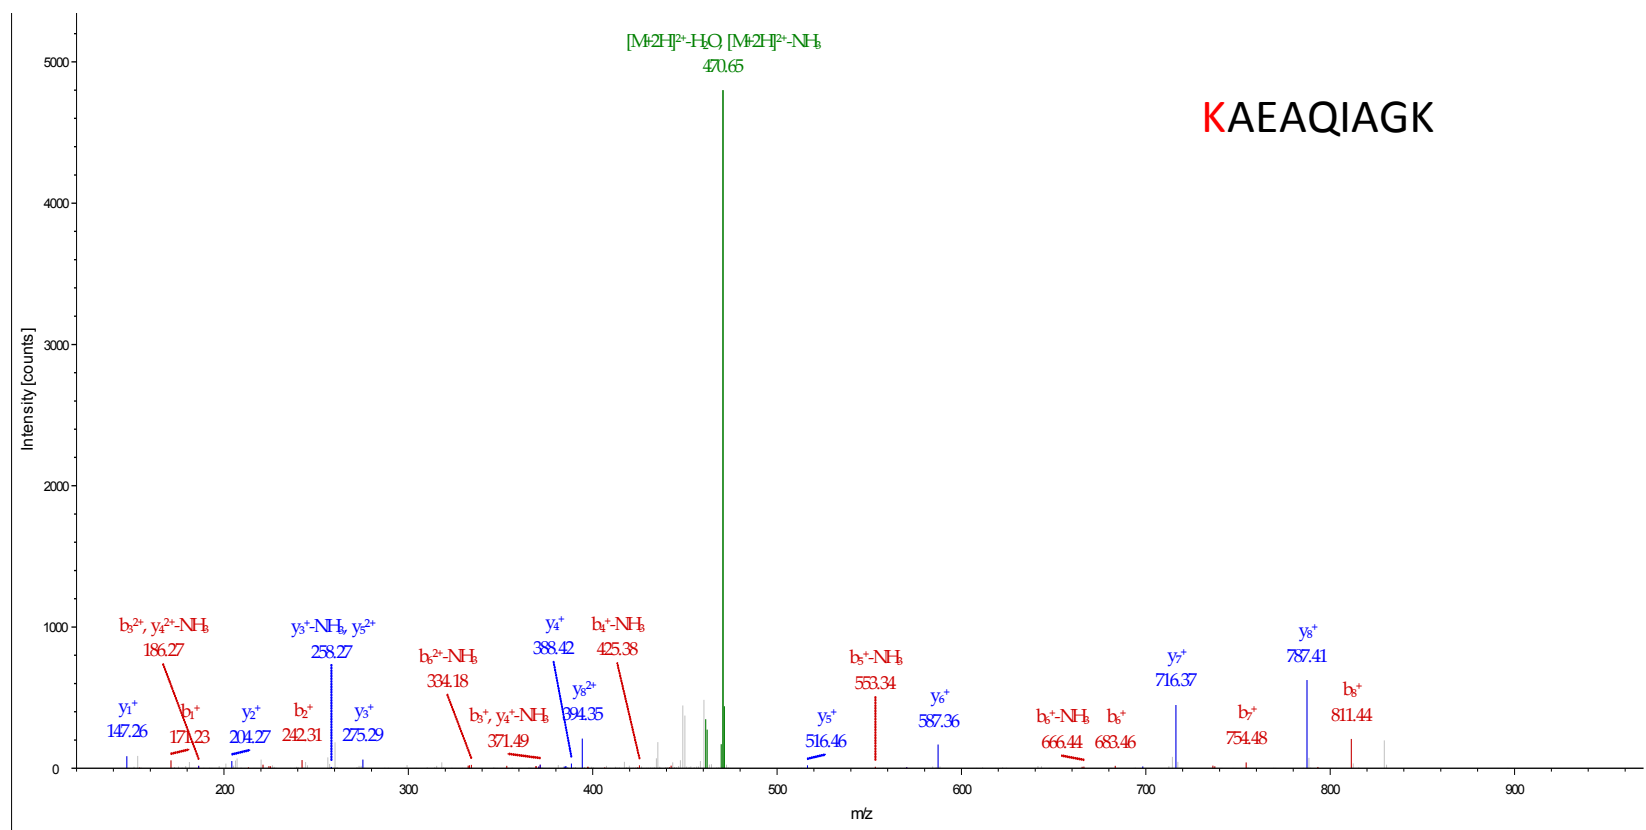

(28)

Figure S1. Cont.

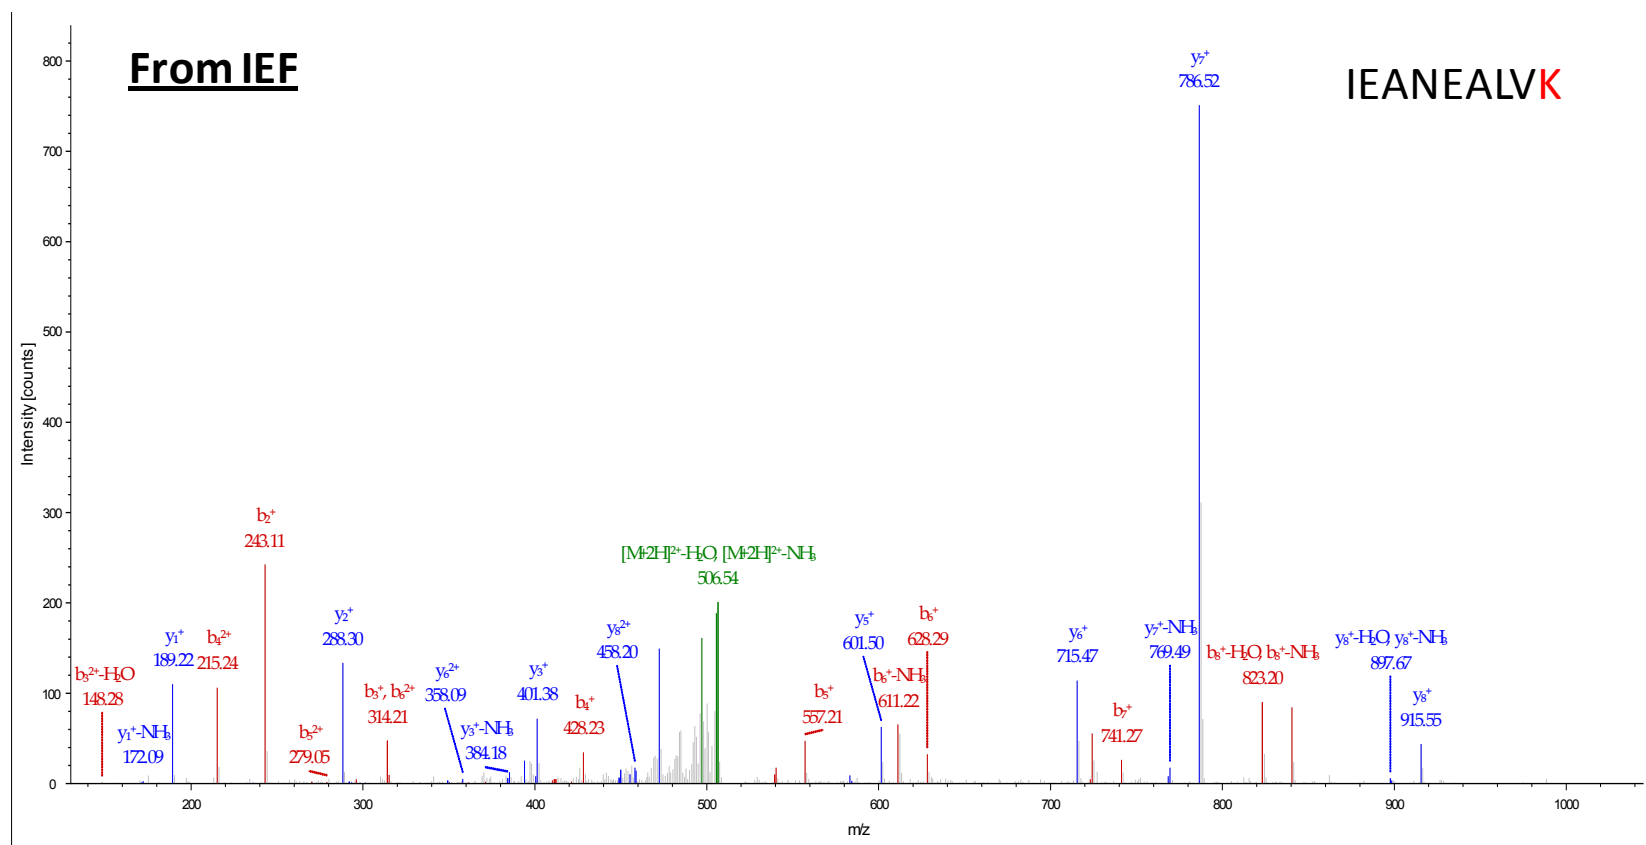

(29)

Figure S1. Cont.

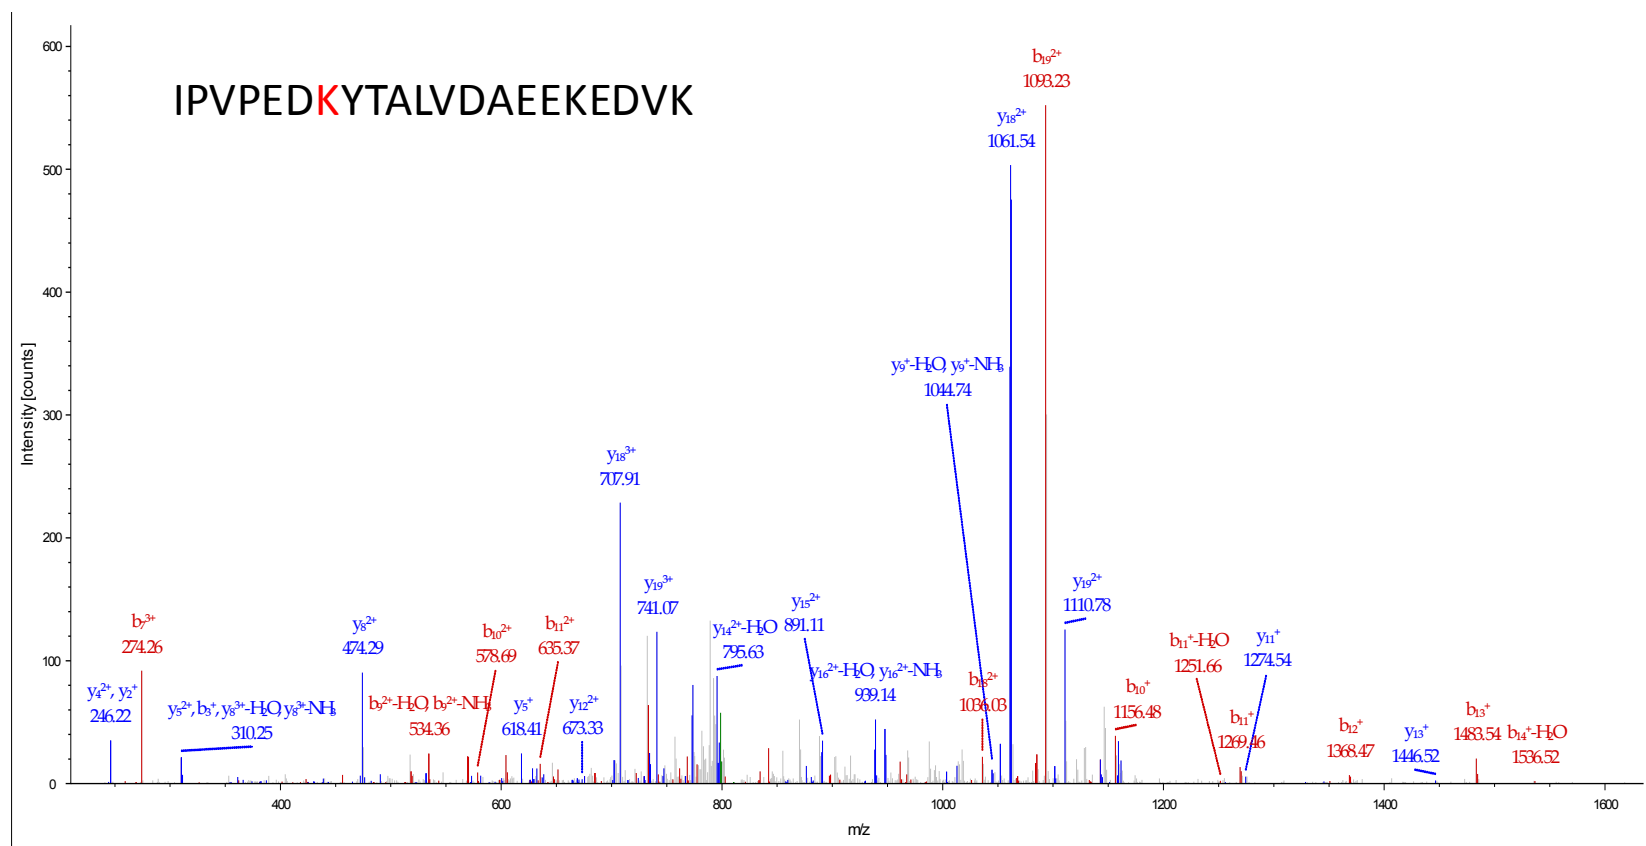

(30)

Figure S1. Cont.

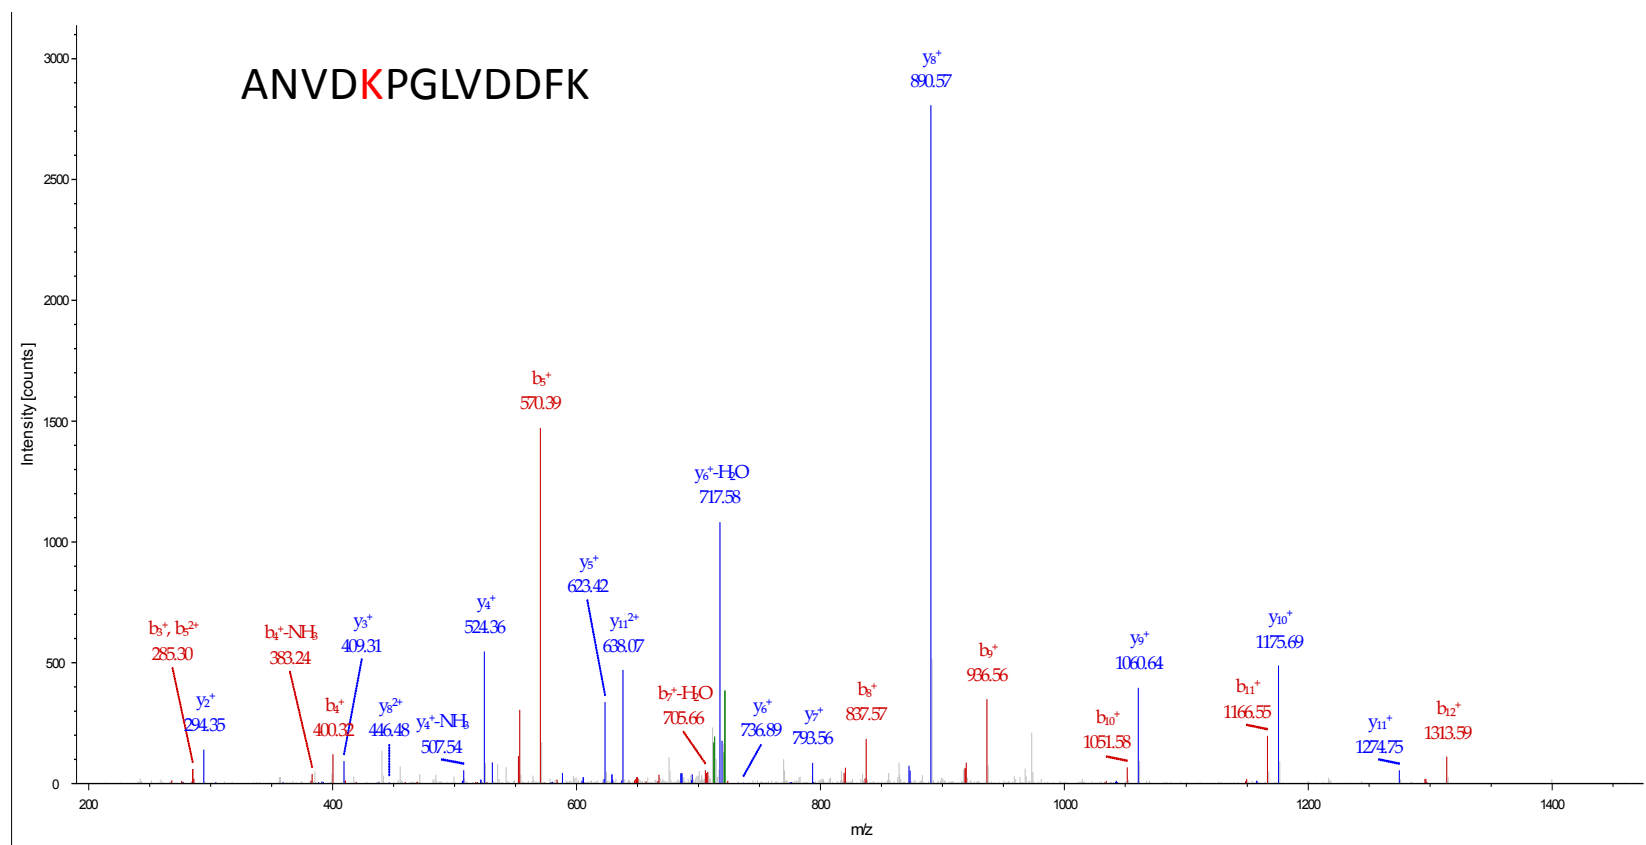

(31)

Figure S1. Cont.

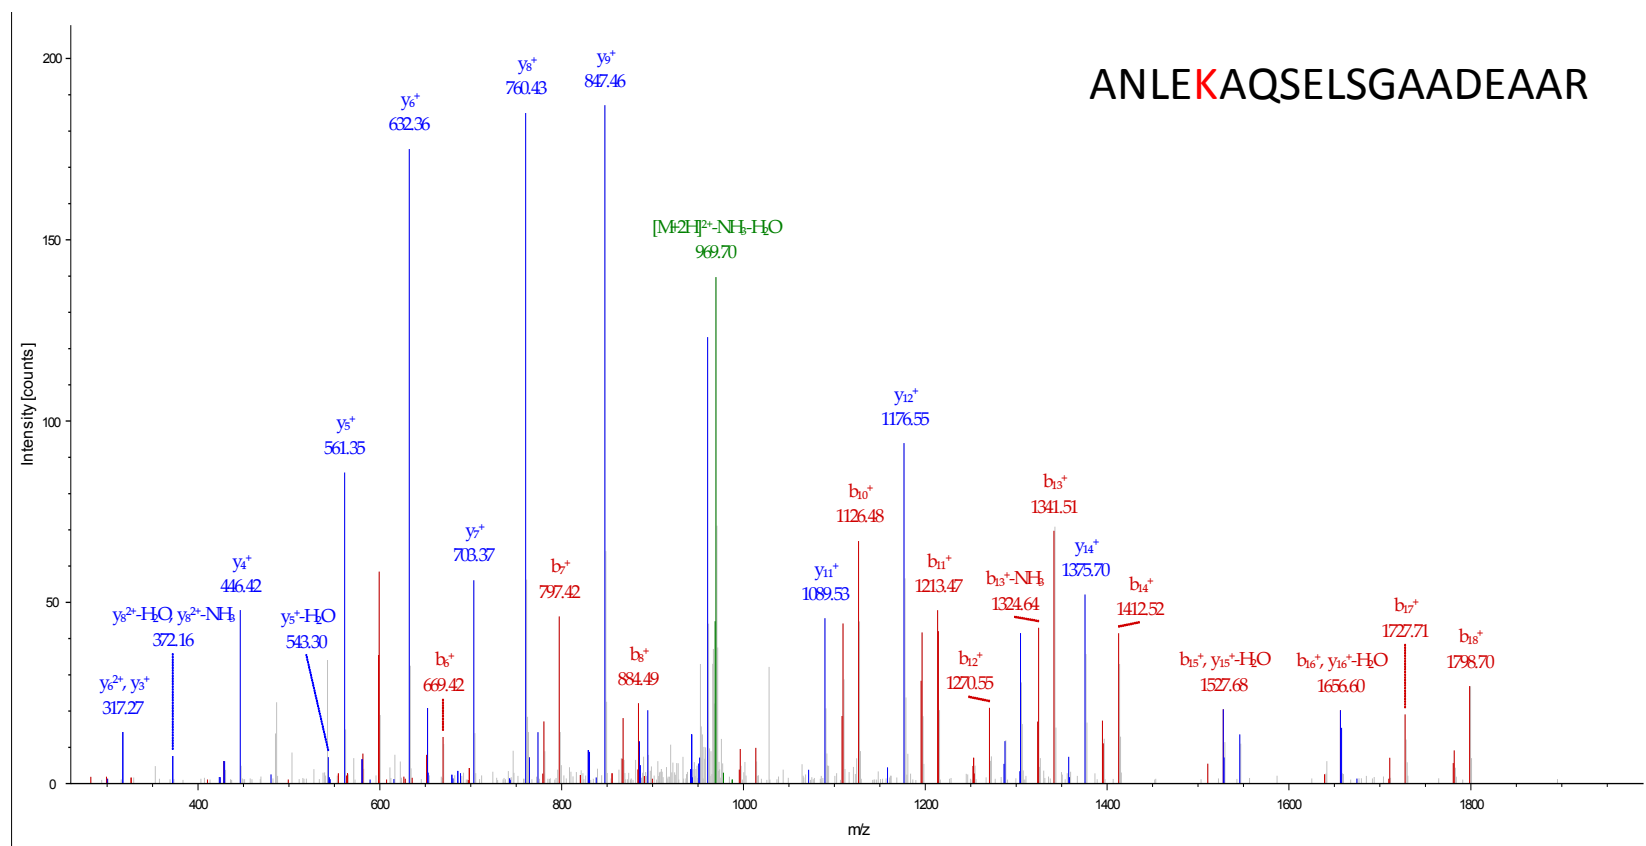

(32)

Figure S1. Cont.

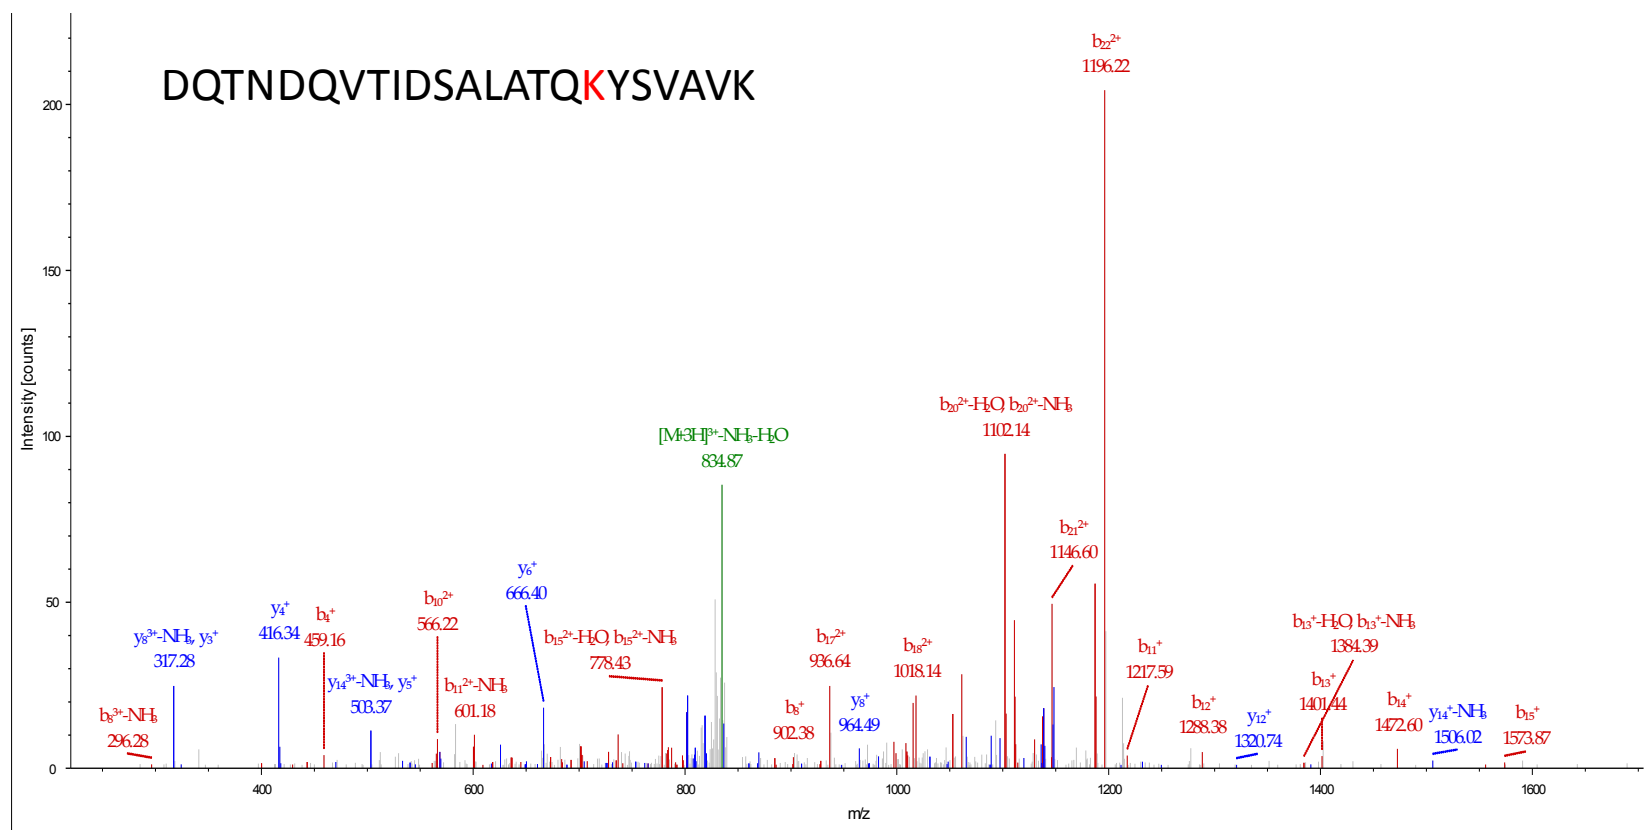

(33)

(34)

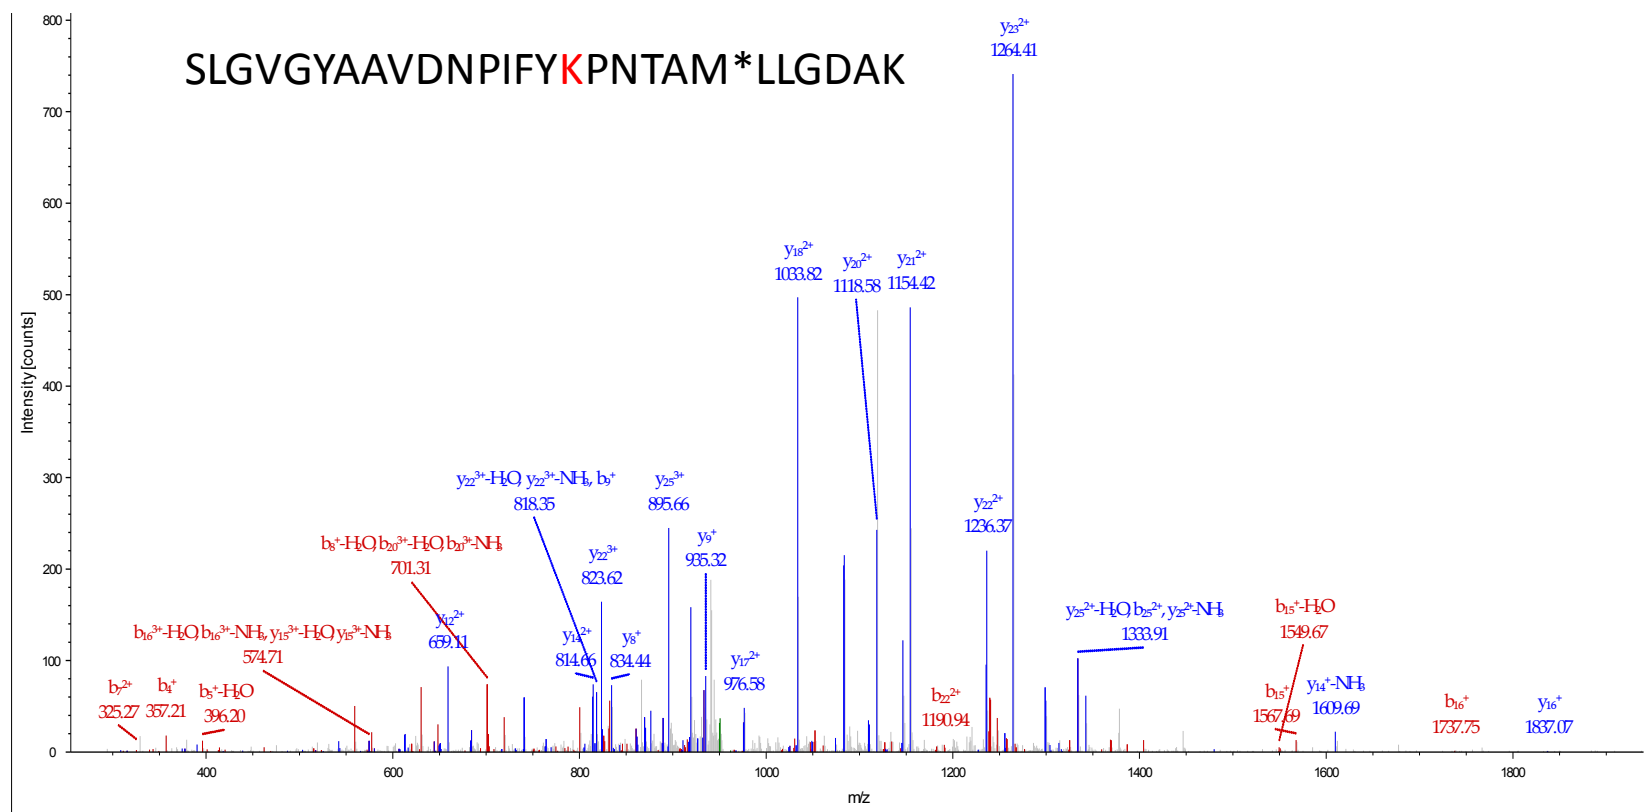

Figure S1. Cont.

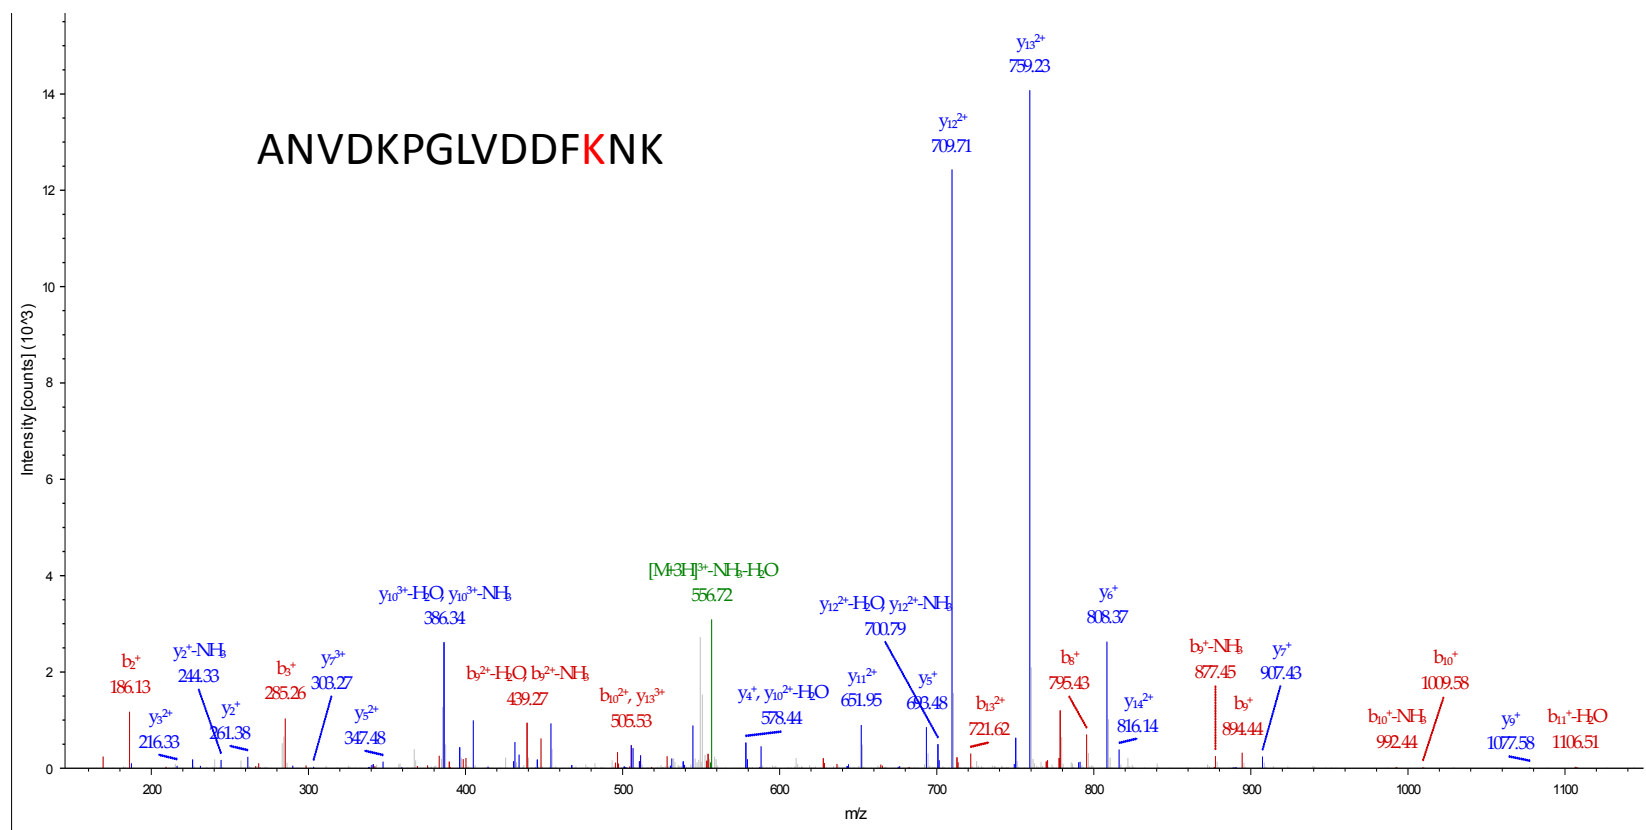

(35)

Figure S1. Cont.

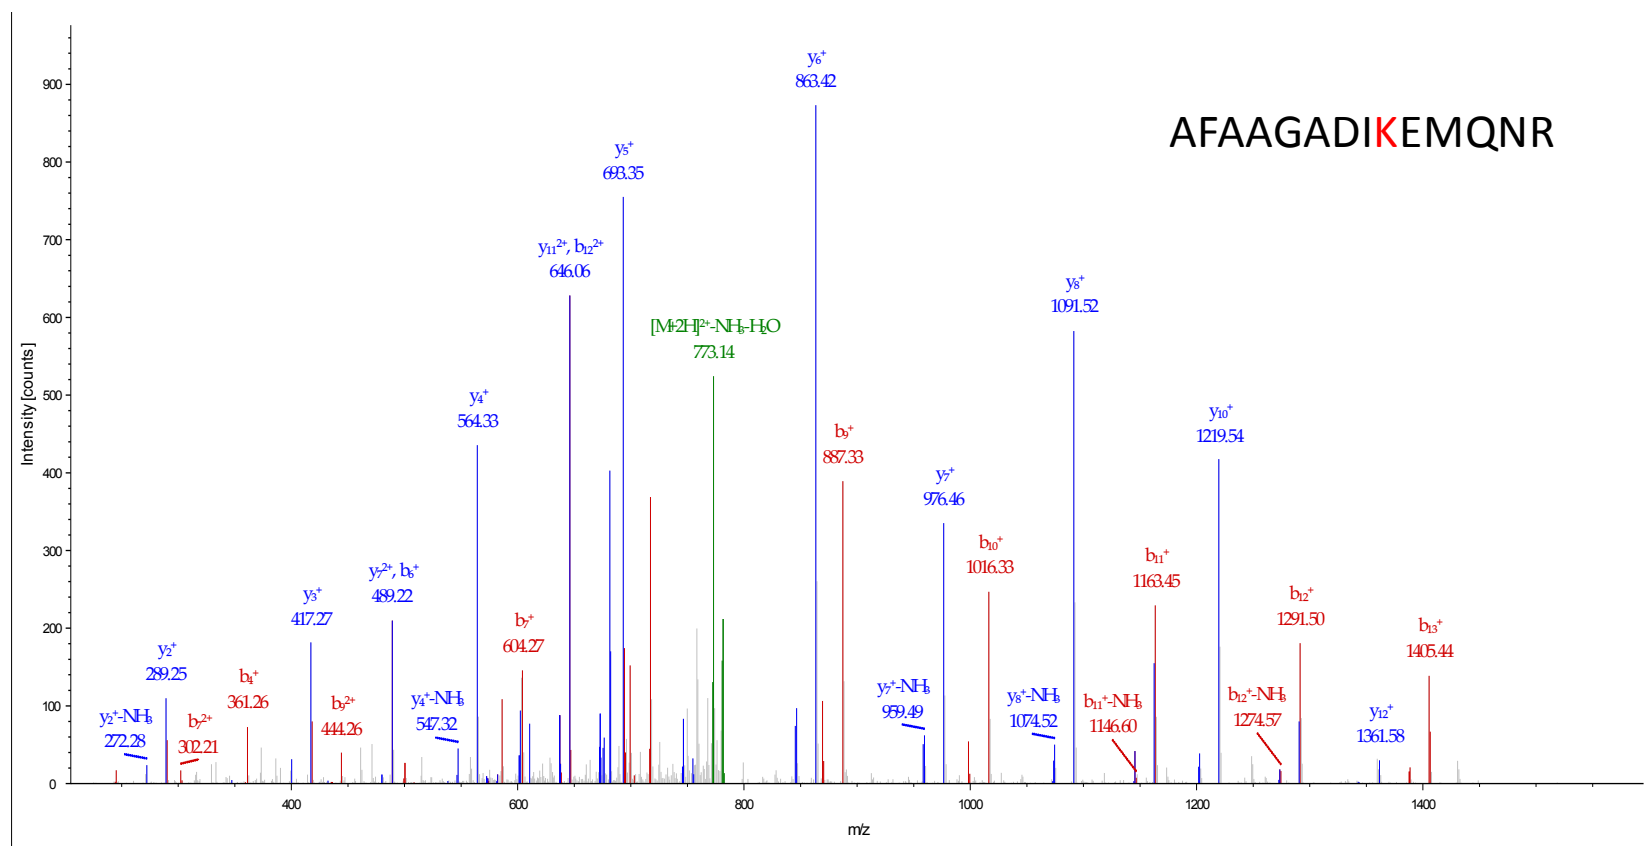

(36)

Figure S1. Cont.

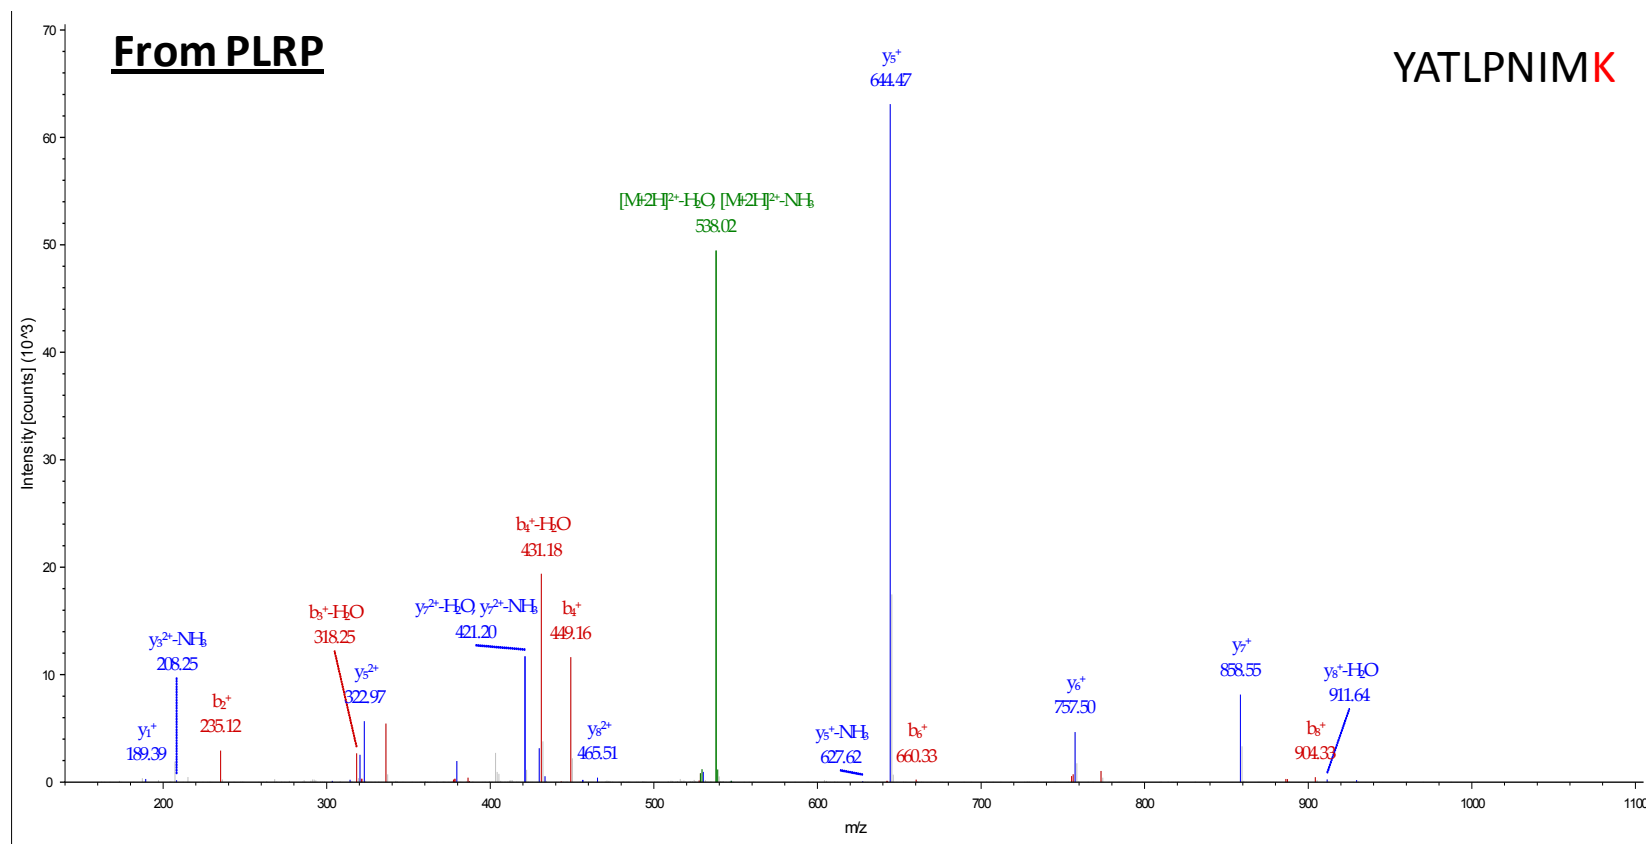

(37)

Figure S1. Cont.

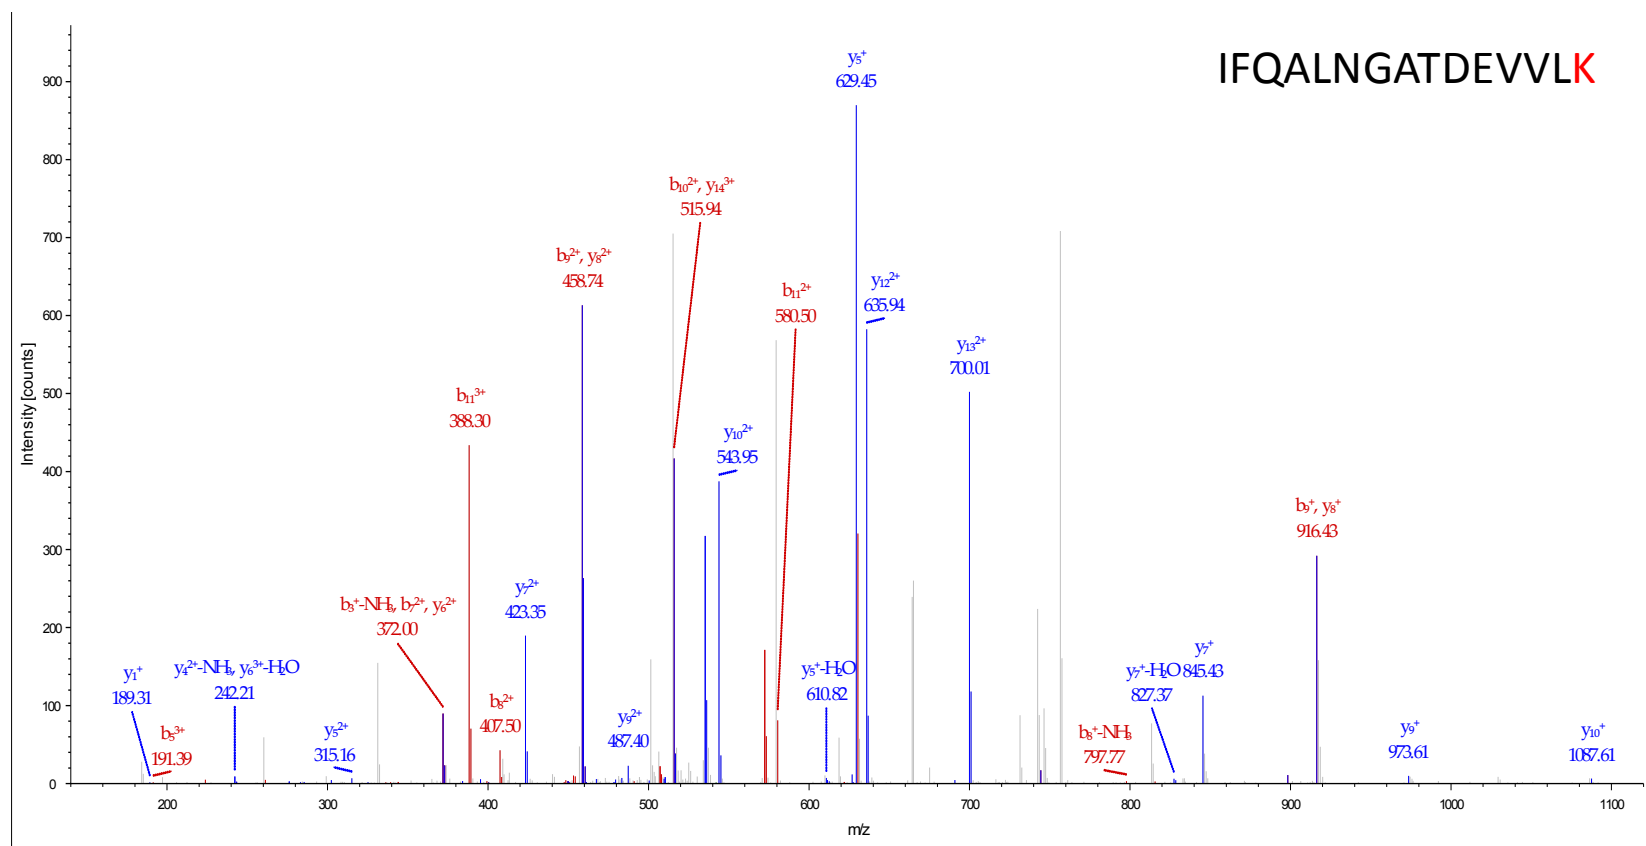

(38)

Figure S1. Cont.

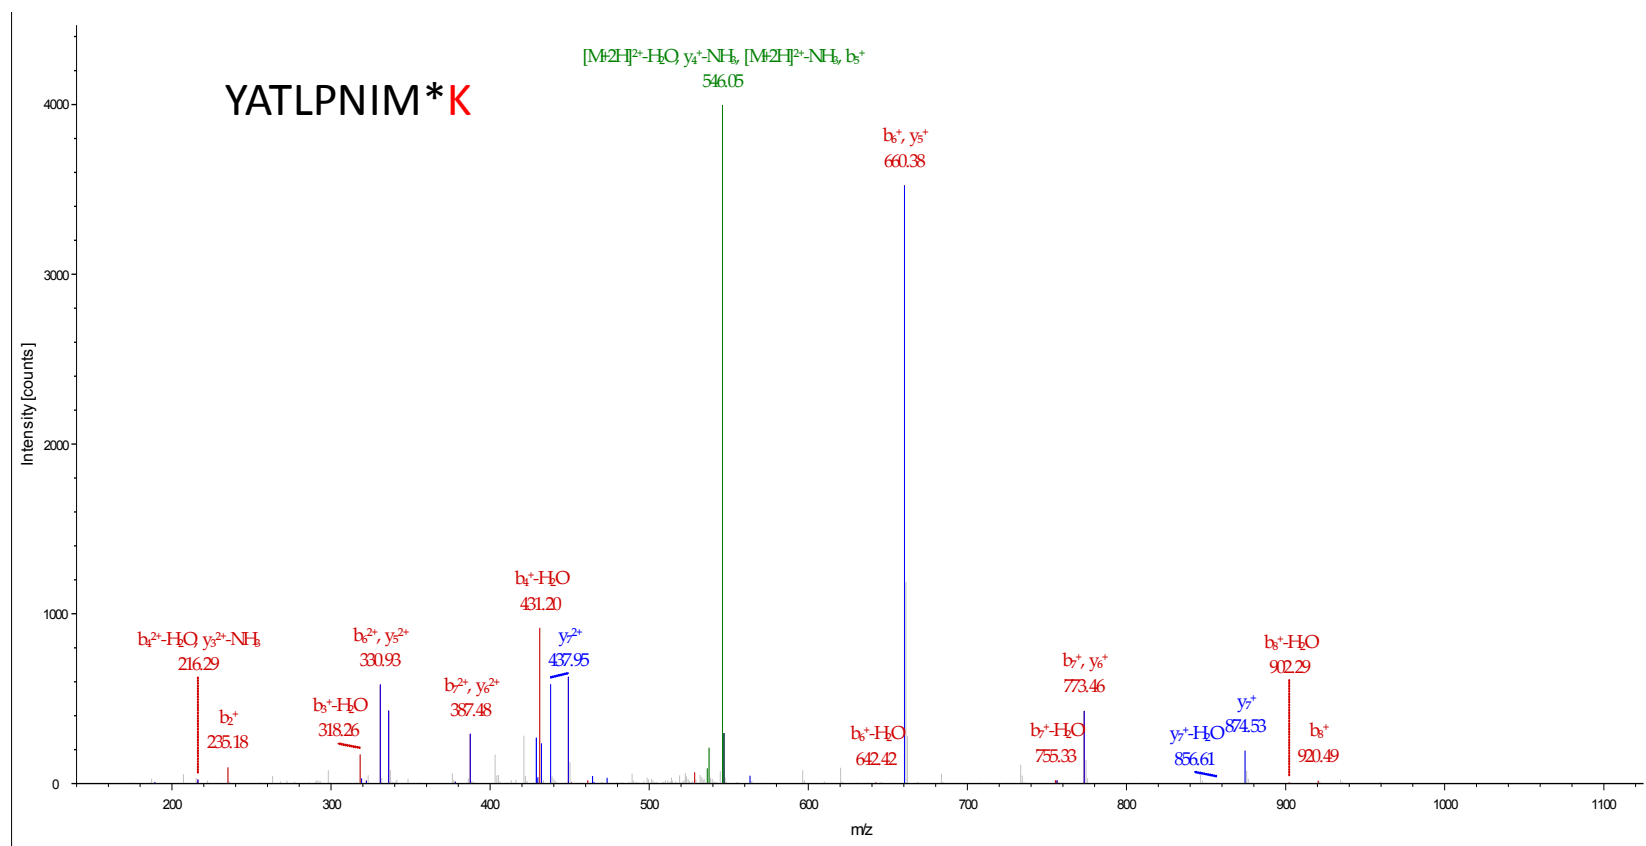

(39)
